# Supplementary material for: Mitochondrial DNA variation across 56,434 individuals in gnomAD
Source: HighWire-hosted journal article supplement (doi:10.1101/gr.276013.121), 2022-01-24
Supplement: Supplemental_material.pdf [file Supplemental_material.pdf]

## **Supplemental Material**

# **Mitochondrial DNA variation across 56,434 individuals in gnomAD**

## **Supplemental Material**

### **Supplemental Figures**

- Supplemental Figure S1 - Comparison of mtDNA variant pipelines
- Supplemental Figure S2 - Two polymorphic NUMTs cause 25 NUMT false positives
- Supplemental Figure S3 - Putative heteroplasmies by mtCN and WGS insert size
- Supplemental Figure S4 - Variant characteristics by Variant Allele Fraction (VAF)
- Supplemental Figure S5 - Coverage and variants in 56,434 gnomAD samples in v3.1
- Supplemental Figure S6 - Heteroplasmic variants by mtDNA haplogroup
- Supplemental Figure S7 - Relative proportion of variants observed
- Supplemental Figure S8 - Allele frequencies of known pathogenic variants in gnomAD

### **Supplemental Tables**

- Supplemental Table S1 - NUMT-Derived False Positives (Excel file downloaded separately)
- Supplemental Table S2 - Pipeline filters and flags
- Supplemental Table S3 - Homoplasmic stop gain and frameshift variants
- Supplemental Table S4 - Possible synonymous G>A variants not seen at homoplasmy

### **Genome Aggregation Database Consortium Author List**

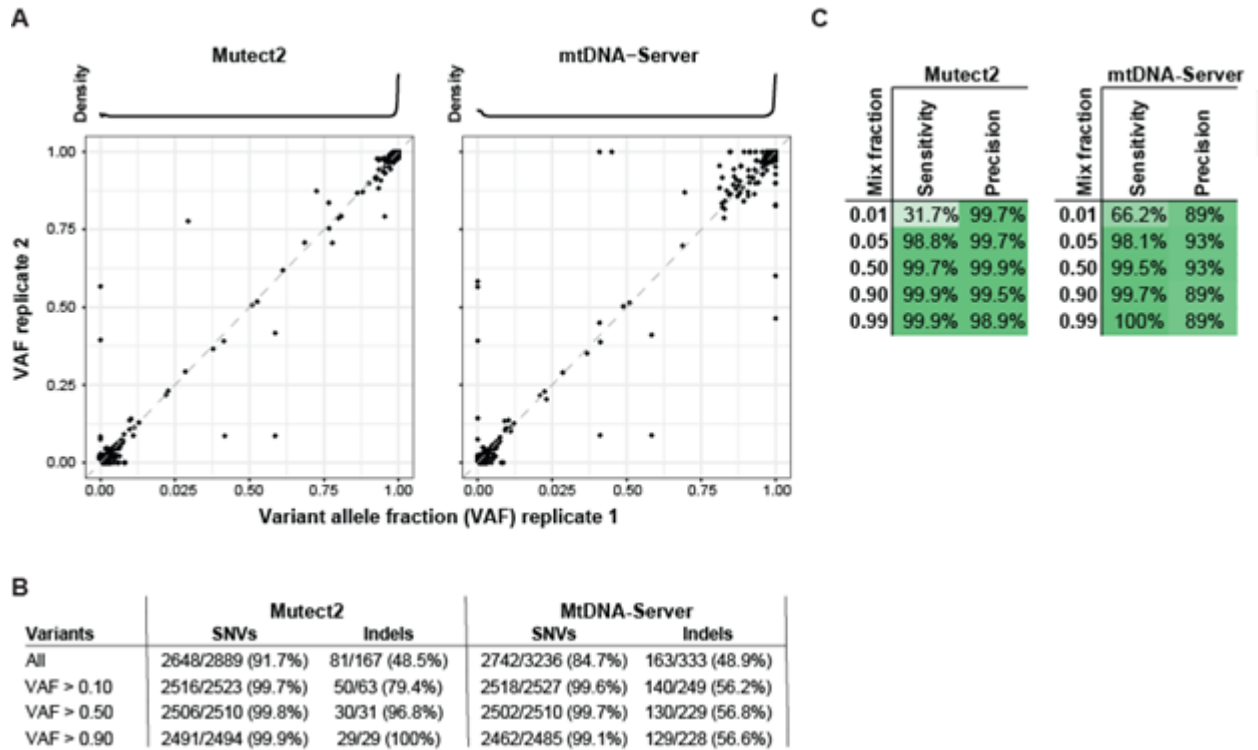

**Supplemental Figure S1 - Comparison of mtDNA variant pipelines.** (A) Reproducibility of mtDNA SNV calls on 91 WGS replicate samples between GATK Mutect2 pipeline versus mtDNA-Server. Density plot above shows most variants are homoplasmic. (B) Jaccard index (# variants detected in both replicates/# variants detected in either replicate) is shown at different VAF thresholds. (C) Heatmap shows estimated accuracy of single-sample pipelines for SNV detection (Mutect2 and mtDNA-Server) for samples with mtCN > 500 based on “in silico” mixing data. Note indels were not included in this table since mtDNA-Server formatted equivalent indels in a different way from the truth dataset, which caused inaccurate comparisons. Even for SNVs, some of mtDNA-Server’s reduced precision is due to differences in formatting variants compared to the truth data. As described in the text, neither the replicate analysis nor in silico mixing analysis estimates false positives derived from NUMTs.

A

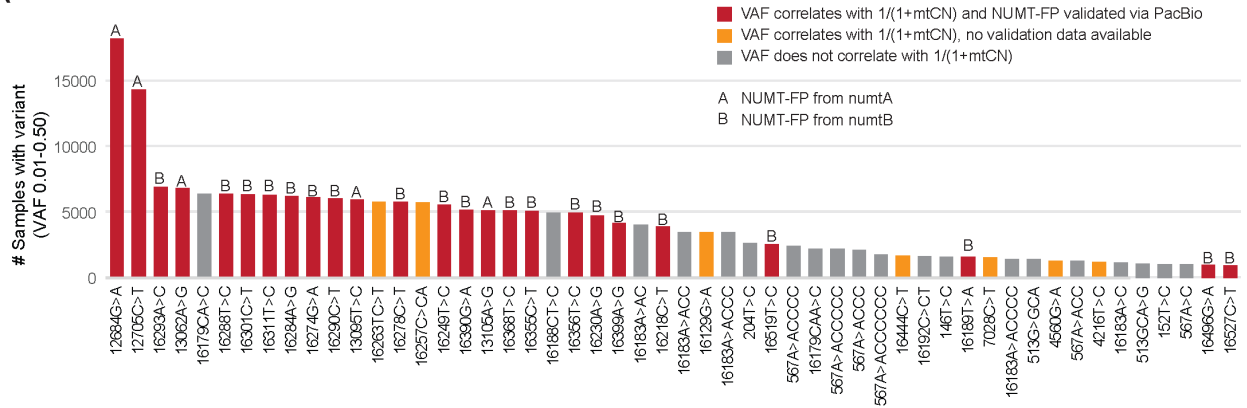

B

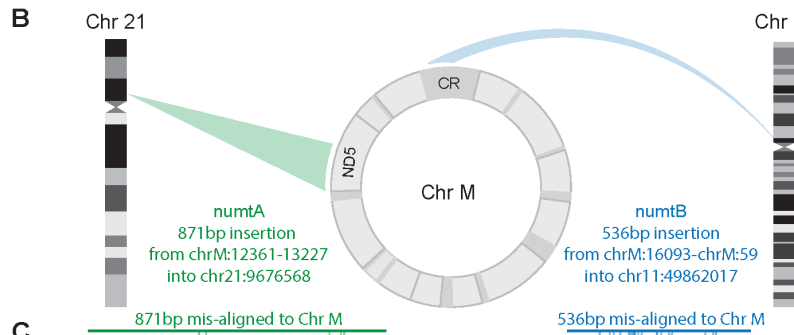

C

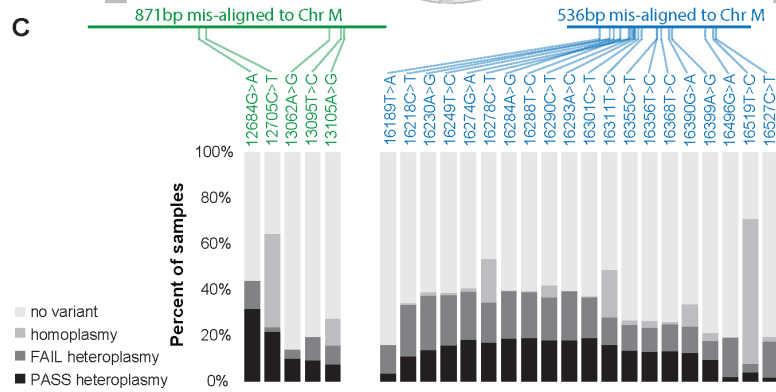

D

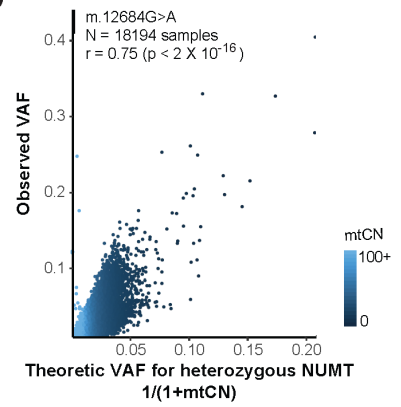

E

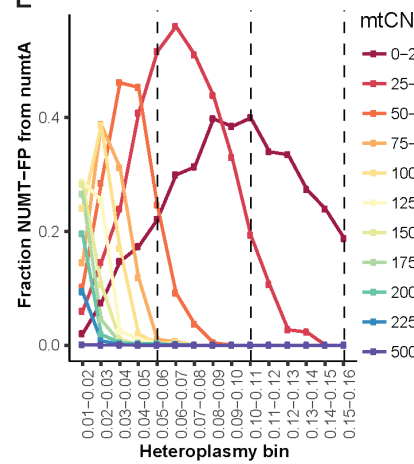

F

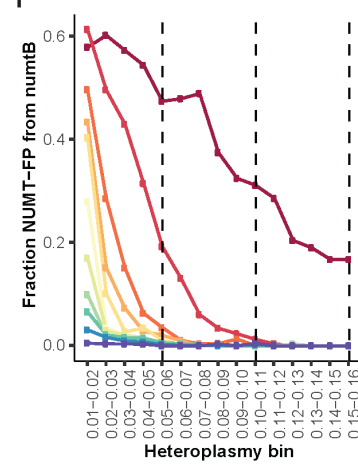

**Supplemental Figure S2 - Two polymorphic NUMTs cause 25 NUMT false positives (NUMT-FPs).**

(A) Barplot shows the 52 most common putative heteroplasmies, colored by correlation with  $1/(1+mtCN)$  including all 25 NUMT-FPs. (B) Schematic shows the location of two NUMTs not in the reference genome that were validated by PacBio long-read sequencing, derived from mtDNA regions within the *MT-ND5* gene and the non-coding control region (CR). (C) When misaligned to Chr M, numtA gives rise to 5 NUMT-FPs (green) and numtB gives rise to 20 NUMT-FPs (blue). Schematic at top shows the position of the NUMT-FPs and the bar graph at bottom shows the percent of all samples with variants. (D) For variant m.12684G>A from numtA, scatterplot shows the observed VAF across samples versus the theoretical VAF if the NUMT were heterozygous and all reads misaligned to Chr M. Points represent samples with passing variants (VAF 0.01-0.50) and are colored by mtCN. Variants from numtA typically show significantly higher observed VAF than those from numtB (Fig. 2E), perhaps indicating they are present at more than one copy in the nuclear genome. (E-F) X-axis indicates VAF bin and Y-axis indicates the percent of detected variants that occur at 5 NUMT-FP sites derived from numtA (E) or 20 NUMT-FP sites from numtB (F), where samples are grouped by mtCN. NUMT-FPs are counted only when a sample has at least 2 PASS variants (VAF 0.01-0.50) from the same NUMT. These panels again suggest numtA is present at higher copy number in the nuclear genome compared to numtB.

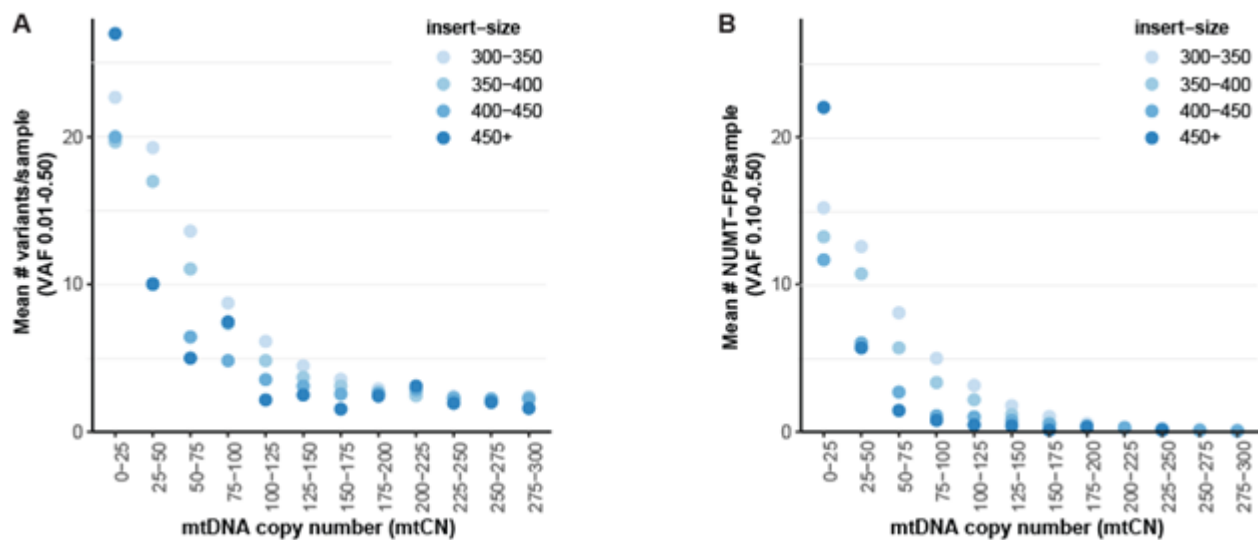

**Supplemental Figure S3 - Putative heteroplasmies by mtCN and WGS insert size.**

Mean number of putative heteroplasmies (VAF 0.01-0.50) (A) or NUMT false positives (NUMT-FP) variants (VAF 0.01-0.50) (B) is shown for samples grouped by mtDNA copy number (X-axis) and sample median insert size (color). These plots show that shorter WGS fragments are more likely to misalign to the mtDNA and cause NUMT-FPs, but this effect is observed more in samples with low mtCN (where misalignment causes FPs with VAF > 0.01).

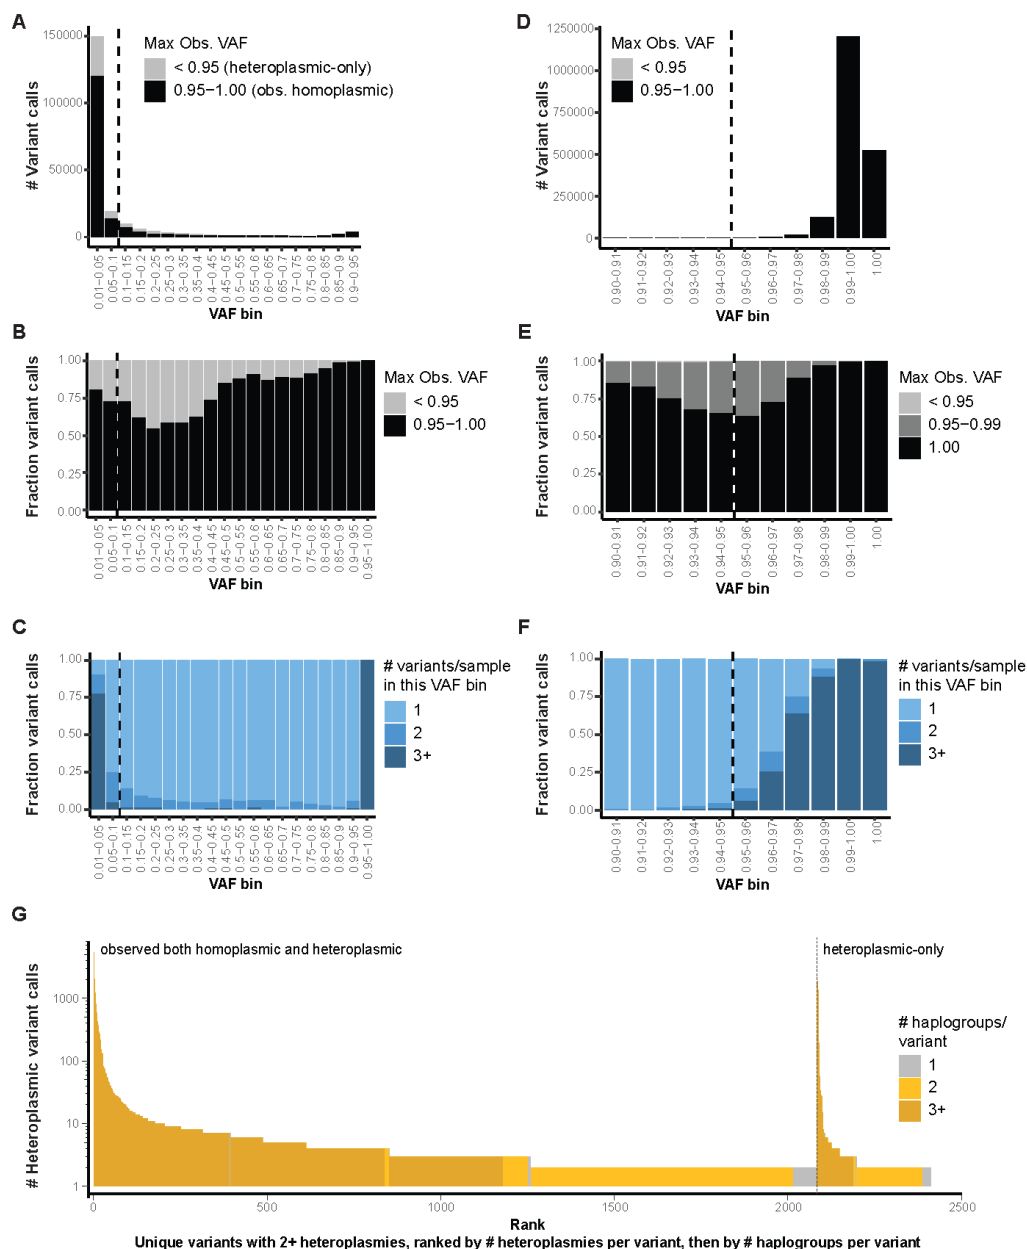

**Supplemental Figure S4 - Characteristics of heteroplasmic and homoplasmic (or near-homoplasmic) variants.**

(A) Number of heteroplasmic variant calls versus the reference assembly shown by Variant Allele Fraction (VAF), with variants colored by maximum observed VAF for the variant across all 56,434 released samples. Dashed line indicates the selected threshold for PASS variants (VAF  $\geq 0.10$ ). Bin label X-Y indicates  $X \leq \text{VAF} < Y$ .

(B) Fraction of variant calls at each VAF level, colored by maximum observed VAF for the variant.

(C) Fraction of variant calls at each VAF level, colored by the number of variants in the same sample at the given VAF bin. Samples with 3 or more heteroplasmic variants at the same VAF may indicate artifacts from contamination or NUMT-misalignment – and are strongly enriched at VAF level 0.01-0.05, and substantially enriched at VAF level 0.05-0.10. Excludes multi-allelic variants.

(D) Number of heteroplasmic variant calls between VAF 0.90-1.00, showing there are very few variant calls with VAF 0.90-0.96. Dashed line indicates selected threshold for “homoplasmic or near homoplasmic” variants ( $\text{VAF} \geq 0.95$ ). Bin label X-Y indicates  $X \leq \text{VAF} < Y$ .

(E) Fraction of variant calls at each VAF 0.90-1.00, colored by maximum observed VAF for the variant, showing that nearly all these variants are also observed with  $\text{VAF} \geq 0.95$  (dark gray or black) in at least one other sample.

(F) Fraction of variant calls at each VAF 0.90-1.00, colored by the number of variants in the same sample at the given VAF level. Samples with 3 or more heteroplasmic variants at the same VAF may indicate true homoplasmic variants that appear at  $\text{VAF} < 1.00$  due to artifacts from contamination or NUMT-misalignment – and are enriched at  $\text{VAF} \geq 0.95$ , justifying the selected threshold of 0.95 used to indicate variants “homoplasmic or near homoplasmic”. Multiallelic variants are excluded.

(G) Barplot shows unique heteroplasmic variants (VAF 0.10-0.95) that are detected heteroplasmic (VAF 0.10-0.95) in at least two individuals. Y-axis shows number of heteroplasmies (VAF 0.10-0.95) at each unique variant. X-axis ranks unique variants by (i) presence at homoplasmy-and-heteroplasmy vs heteroplasmic-only, (ii) number of heteroplasmies per variant, and (iii) number of distinct haplogroups observed for that variant (where distinct haplogroups are defined based on the first 2 haplogroup symbols, e.g. L1 or H2). Plot shows that most heteroplasmic variants are found in at least 2 distinct haplogroups (yellow and orange) and not on the same haplogroup (gray).

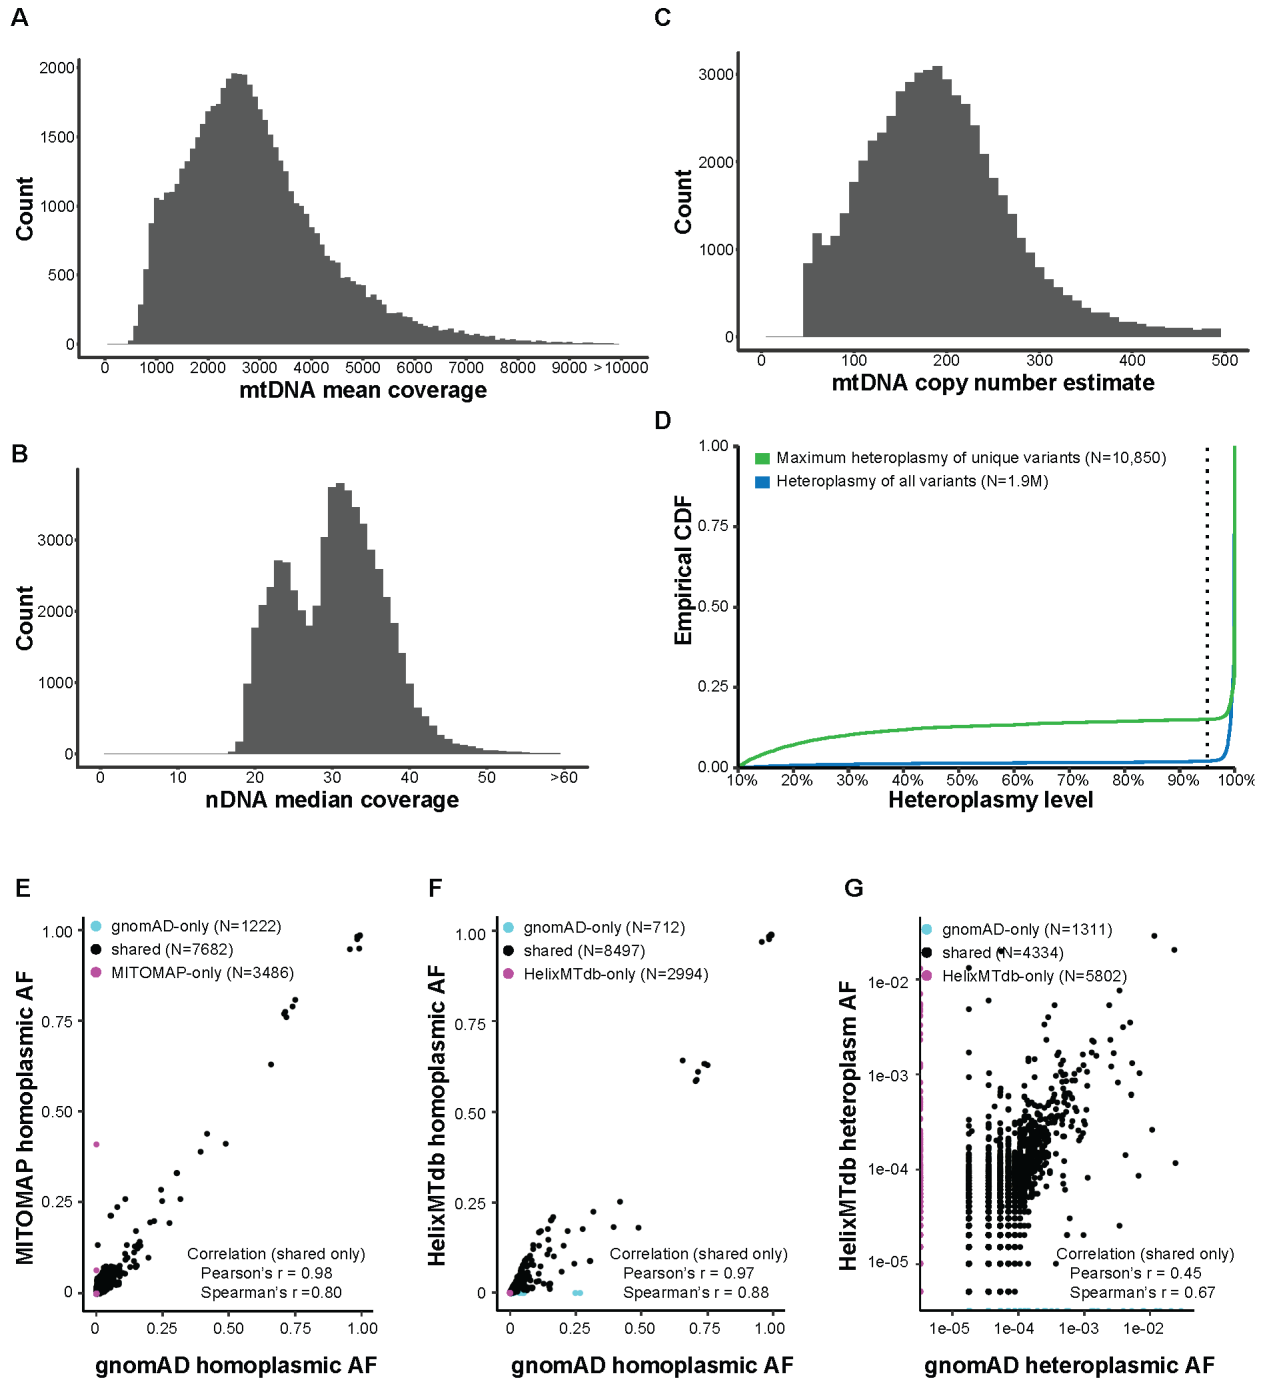

**Supplemental Figure S5 - Coverage and variants in 56,434 gnomAD samples in v3.1 (after filtering).** (A) Histogram shows mean mtDNA coverage. (B) Histogram shows median nuclear (nDNA) coverage. (C) Histogram shows mtDNA copy number defined as  $2 \times \text{mDNA mean coverage} / \text{nDNA median coverage}$ . (D) Empirical cumulative distribution function shows heteroplasmy levels for all variants and unique variants. Dotted line shows 95% heteroplasmy above which variants are categorized “homoplasmic or near homoplasmic”. (E) Comparison of homoplasmic allele frequency (AF) of SNVs in gnomAD v3.1 versus MITOMAP (indels excluded since MITOMAP reports right-aligned indels whereas gnomAD reports left-aligned indels). (F) Comparison of homoplasmic AF of all homoplasmic variants in



gnomAD v3.1 vs HelixMTdb. (F) Comparison of heteroplasmic AF of all heteroplasmic variants in gnomAD v3.1 vs HelixMTdb (note axes are shown log10 since maximum AF < 0.03 for shared variants).

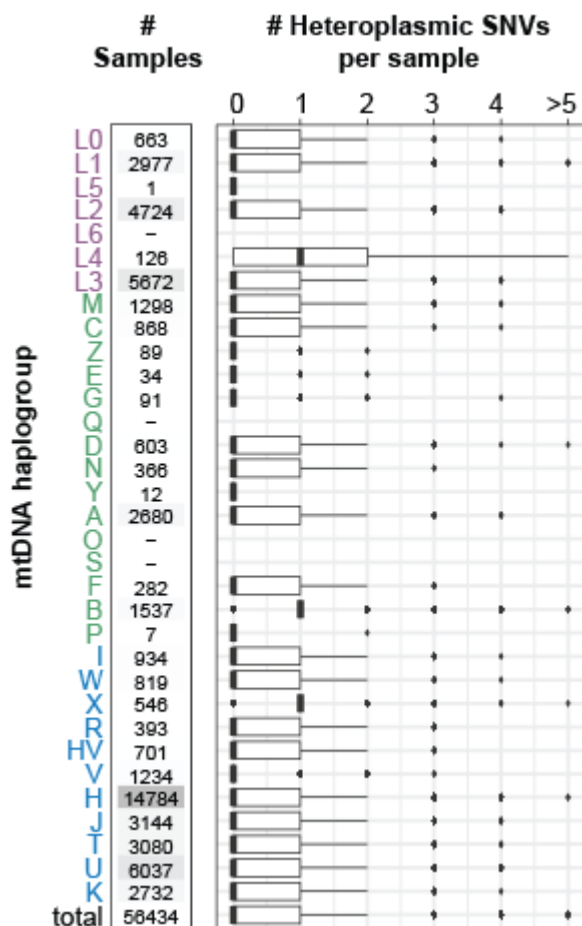

### Supplemental Figure S6 - Heteroplasmic variants by mtDNA haplogroup.

For each haplogroup, the number of samples is shown along with a box plot of the number of heteroplasmic SNVs (VAF 0.10-0.95) per sample. Color indicates mtDNA haplogroups phylogenetically associated with African (purple), Asian (green), or European (blue) origin (Lott et al. 2013). Unlike homoplasmic SNVs (Fig. 4B), the number of heteroplasmies does not depend on haplogroup.

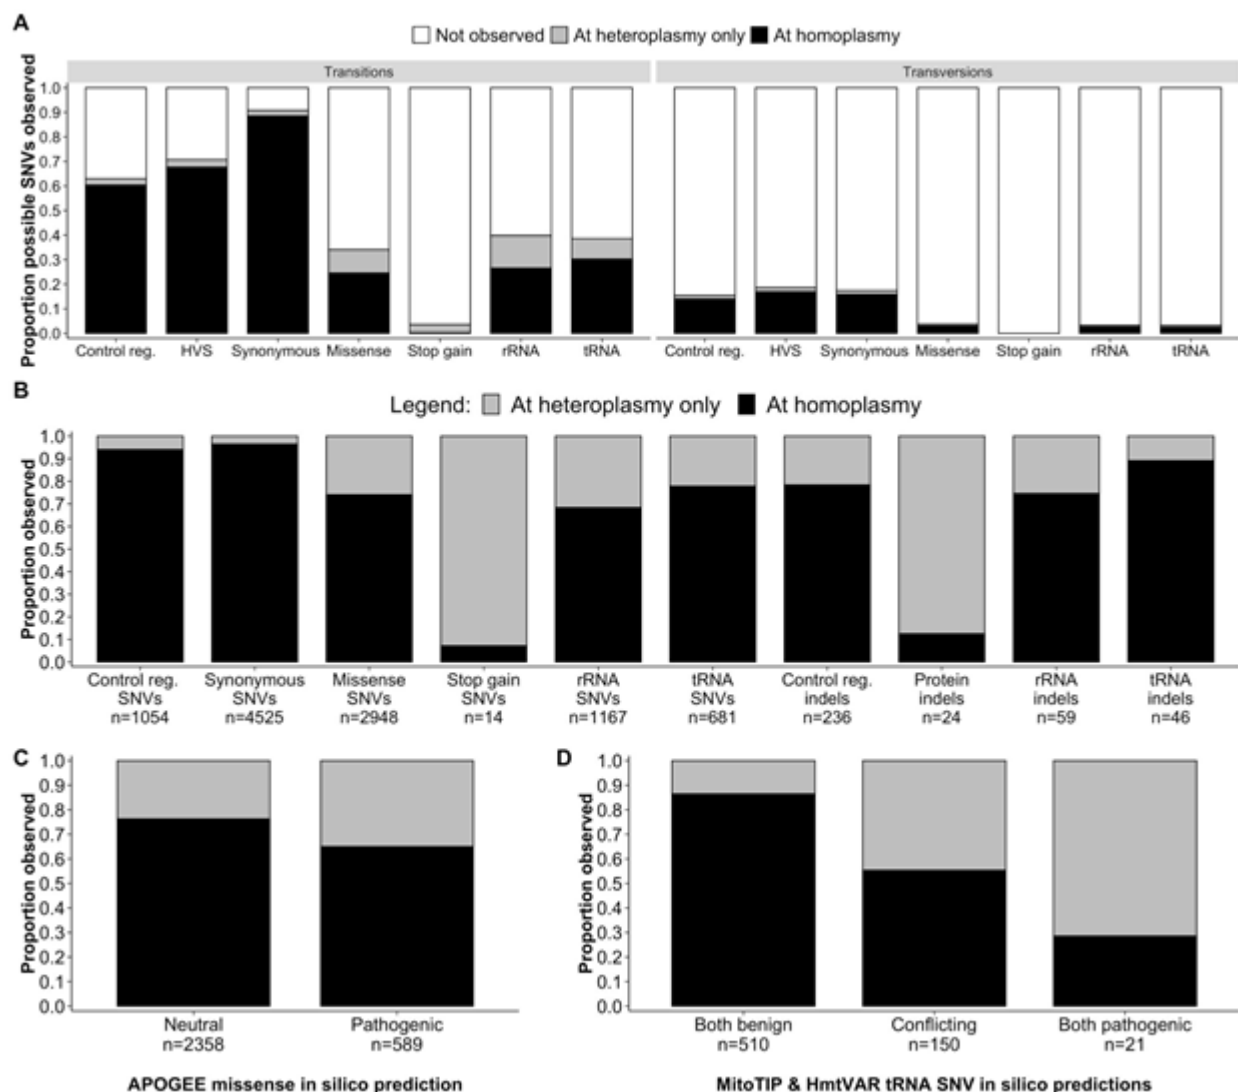

**Supplemental Figure S7 - Relative proportion of variants observed.** (A) The barchart shows the proportion of possible transitions and transversions observed, including those observed at homoplasmy (in at least one individual) (black), those only observed at 10-95% heteroplasmy (gray), or not observed in gnomAD (white). “Control reg.” represents the non-coding control region m.16024-576, and “HVS” represents the three hypervariable segments within this region (m.57-372, m.438-574, m.16024-16383). (B-D) Of unique variants observed in gnomAD, barchart shows proportion detected at homoplasmy (in at least one individual) or only at heteroplasmy for different categories of variants (B), and for in silico prediction algorithms recommended for mtDNA missense (C) and tRNA variant interpretation (D) per McCormick et al (2020). Note “protein indels” in (B) includes both frameshift and in-frame indel variants, and (C) excludes variants with N/A annotations. For (D), MitoTIP annotations “likely pathogenic” and “possibly pathogenic” were regarded as pathogenic, and “likely benign” and “possibly benign” were regarded as benign; for HmtVAR, “pathogenic” and “likely pathogenic” were regarded as pathogenic, and “polymorphic” and “likely polymorphic” were regarded as benign. “Conflicting” includes variants with HmtVAR annotation of “null”. For all figures, “n” represents the number of variants per category.

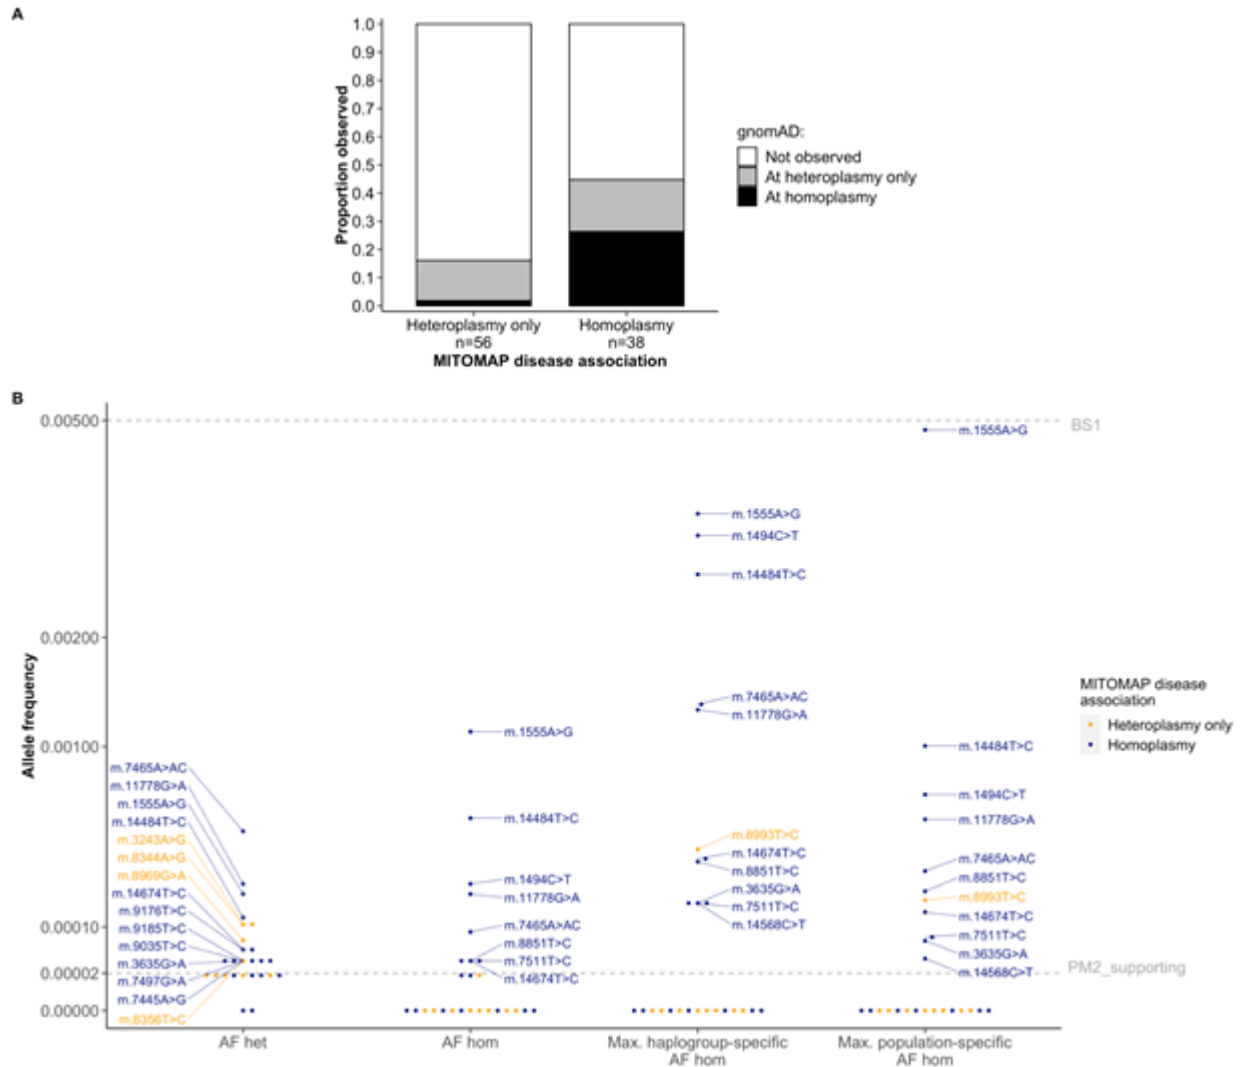

**Supplemental Figure S8 - Allele frequencies of known pathogenic variants in gnomAD.** (A) For variants curated in MITOMAP as causing disease only at heteroplasmy or at homoplasmy (where the latter includes those only associated with disease at homoplasmy, or at both homoplasmy and heteroplasmy), we show the proportion detected in gnomAD at homoplasmy (in at least one individual) (black) or only at heteroplasmy (gray). Note that the variant in the ‘Heteroplasmy only’ group seen at homoplasmy is m.8993T>C, which was recently described in adult-onset cases at homoplasmy (Stendel et al. 2020). (B) The allele frequencies of the 26 pathogenic variants observed in gnomAD are shown, colored by their association with disease curated by MITOMAP. The allele frequencies in gnomAD at heteroplasmy (AF het) and homoplasmy (AF hom), as well as for each mtDNA haplogroup and inferred nuclear ancestry population (see Fig. 4), are displayed. The dashed lines represent the threshold at which benign criteria BS1 (AF > 0.005) or pathogenic criteria PM2 supporting (AF < 0.00002) can be applied. Variants with allele frequency > 0.00002 per category are labelled.

## SUPPLEMENTAL TABLES

**Supplemental Table S1 - NUMT-Derived False Positives.** Details on the 25 NUMT-FP sites validated by PacBio (tab 1), all 124 common heteroplasmic variants (tab 2), and co-occurrence of 67 common heteroplasmies that correlated with  $1/(1+mtCN)$  (tab 3). Available as Excel file downloaded separately.

| Type            | Name                                 | Description                                                                                                                                                                                                                  | # Unique Variants: 0.01-1.00 VAF | # Total Variants: 0.01-1.00 VAF | # Total Variants: 0.10-1.00 VAF |
|-----------------|--------------------------------------|------------------------------------------------------------------------------------------------------------------------------------------------------------------------------------------------------------------------------|----------------------------------|---------------------------------|---------------------------------|
| Genotype filter | strand_bias                          | (FilterMutectCalls) Evidence for alternate allele comes predominantly from one read direction                                                                                                                                | 2,801                            | 185,452                         | 30,036                          |
| Genotype filter | base_qual                            | (FilterMutectCalls min-median-base-quality=20) Median base quality of alternate allele was below minimum                                                                                                                     | 1,044                            | 82,543                          | 1,344                           |
| Genotype filter | weak_evidence                        | (FilterMutectCalls) Mutation does not meet likelihood threshold                                                                                                                                                              | 1,296                            | 72,590                          | 312                             |
| Genotype filter | contamination                        | (FilterMutectCalls) Fails contamination filter based on estimate from Haplocheck                                                                                                                                             | 707                              | 2,791                           | 1                               |
| Genotype filter | position                             | (FilterMutectCalls min-median-read-position=1) Median distance of variant allele from end of reads was below minimum                                                                                                         | 302                              | 558                             | 9                               |
| Genotype filter | union of above 5 categories          | Union of all FilterMutectCalls                                                                                                                                                                                               | 4,194                            | 225,193                         | 30,848                          |
| Genotype filter | heteroplasmy_below_min_het_threshold | VAF < 0.10                                                                                                                                                                                                                   | 14,183                           | 442,973                         | -                               |
| Site filter     | artifact_prone_site                  | Variant overlaps any of 6 specific mtDNA positions (301, 302, 310, 316, 3107, 16182) where sequence context makes it difficult to distinguish true variants from technical artifacts                                         | 446                              | 332,946                         | 121,644                         |
| Variant filter  | indel_stack                          | Heteroplasmic indel variant only detected with multi-allelic calls (e.g., 102/182 unique indel variants detected at chrM:5892 are only detected with at least one other heteroplasmic indel at chrM:5892 in the same person) | 383                              | 9,385                           | 3,685                           |
| Variant filter  | npg                                  | No sample had a pass genotype for the variant                                                                                                                                                                                | 7,078                            | 47,944                          | 408                             |
| Variant flag    | common_low_heteroplasmy              | Allele frequency (AF) > 0.001 (considering PASS variants VAF 0-0.50)                                                                                                                                                         | 374                              | 1,513,015                       | 1,164,672                       |

### Supplemental Table S2 - Pipeline filters and flags.

Filters indicate variants that fail quality control, whereas flags indicate variants that pass quality control but should be interpreted with caution. The single-sample GATK pipeline assigns genotype filters (per sample, per variant) via FilterMutectCalls. The single-sample VCFs are combined, processed, and filtered using Hail scripts that assign additional genotype filters (per sample, per variant), site filters (per mtDNA position), variant filters (per variant), and variant flags (per variant). Statistics are reported on the 56,434 samples that pass quality control filters. Note filters are not mutually exclusive.

| Variant     | Gene    | VEP protein consequence | Type                | Max het | AC hom | AC het | Note                                                                                                                                                                                                                                               | Updated protein consequence |
|-------------|---------|-------------------------|---------------------|---------|--------|--------|----------------------------------------------------------------------------------------------------------------------------------------------------------------------------------------------------------------------------------------------------|-----------------------------|
| m.5185 G>A  | MT-ND2  | p.Trp239Ter             | Stop gained         | 99.7 %  | 1      | 0      | On same allele as m.5186A>T, resulting in a missense variant                                                                                                                                                                                       | p.Trp239Tyr                 |
| m.8496 TA>T | MT-ATP8 | p.Asn46Ilefs Ter?       | Frame-shift variant | 99.3 %  | 1      | 0      | Possible translation of a protein the same length as MT-ATP8, as inclusion of the first 3'UTR base produces the 'non-standard' mitochondrial stop codon AGG, with a T immediately preceding as has been suggested for AGG terminator functionality | p.Asn46Ilefs Ter23          |

**Supplemental Table S3 - Homoplasmic stop gain and frameshift variants.** Abbreviations het: heteroplasmy; hom: homoplasmy; AC allele count.

| Variant    | Gene/s                             | Consequence/s              | HGVSc               | HGVSp                 | gnomAD<br>max het | HelixMTdb<br>max het | MITOMAP<br>allele count |
|------------|------------------------------------|----------------------------|---------------------|-----------------------|-------------------|----------------------|-------------------------|
| m.3315G>A  | <i>MT-ND1</i>                      | synonymous                 | c.9G>A              | p.Met3                | 0                 | 0                    | 1                       |
| m.5906G>A  | <i>MT-CO1</i>                      | synonymous                 | c.3G>A              | p.Met1                | 0                 | 0                    | 0                       |
| m.7588G>A  | <i>MT-CO2</i>                      | synonymous                 | c.3G>A              | p.Met1                | 63.6%             | 15.2%                | 0                       |
| m.8368G>A  | <i>MT-ATP8</i>                     | synonymous                 | c.3G>A              | p.Met1                | 0                 | 12.7%                | 0                       |
| m.8529G>A  | <i>MT-ATP6</i> ,<br><i>MT-ATP8</i> | synonymous,<br>stop gained | c.3G>A,<br>c.164G>A | p.Met1,<br>p.Trp55Ter | 0                 | 0                    | 0                       |
| m.9209G>A  | <i>MT-CO3</i>                      | synonymous                 | c.3G>A              | p.Met1                | 18.7%             | 32.9%                | 1                       |
| m.10472G>A | <i>MT-ND4L</i>                     | synonymous                 | c.3G>A              | p.Met1                | 0                 | 0                    | 0                       |
| m.10762G>A | <i>MT-ND4</i> ,<br><i>MT-ND4L</i>  | synonymous,<br>missense    | c.3G>A,<br>c.293G>A | p.Met1,<br>p.Cys98Tyr | 0                 | 0                    | 0                       |
| m.12345G>A | <i>MT-ND5</i>                      | synonymous                 | c.9G>A              | p.Met3                | 10.8%             | 81.1%                | 0                       |
| m.14655G>A | <i>MT-ND6</i>                      | synonymous                 | c.19C>T             | p.Leu7                | 0                 | 100%                 | 0                       |
| m.14749G>A | <i>MT-CYB</i>                      | synonymous                 | c.3G>A              | p.Met1                | 0                 | 0                    | 0                       |

**Supplemental Table S4 - Possible synonymous G>A variants not seen at homoplasmy.** The maximum heteroplasmy of these variants in HelixMTdb and their allele count in MITOMAP databases are also shown (heteroplasmy information not available in MITOMAP). The c.3G>A variant in *MT-ND6*, the only protein encoded on the non-reference strand and also with an AUG start codon, was also not observed (equivalent to m.14671C>T). Note maximum heteroplasmy in HelixMTdb was inferred to be 100% if the variant was observed at homoplasmy. Two of these variants lie in two genes and thus have multiple consequences. Max het = maximum heteroplasmy.

## Genome Aggregation Database Consortium Authors and Affiliations

Maria Abreu<sup>1</sup>, Carlos A. Aguilar Salinas<sup>2</sup>, Tariq Ahmad<sup>3</sup>, Christine M. Albert<sup>4,5</sup>, Jessica Alföldi<sup>6,7</sup>, Diego Ardisino<sup>8</sup>, Irina M. Armean<sup>6,7,9</sup>, Gil Atzmon<sup>10,11</sup>, Eric Banks<sup>12</sup>, John Barnard<sup>13</sup>, Samantha M. Baxter<sup>6</sup>, Laurent Beaugier<sup>14</sup>, Emelia J. Benjamin<sup>15,16,17</sup>, David Benjamin<sup>12</sup>, Louis Bergelson<sup>12</sup>, Michael Boehnke<sup>18</sup>, Lori L. Bonnycastle<sup>19</sup>, Erwin P. Bottinger<sup>20</sup>, Donald W. Bowden<sup>21,22,23</sup>, Matthew J. Bown<sup>24,25</sup>, Steven Brant<sup>26</sup>, Sarah E. Calvo<sup>6,27</sup>, Hannia Campos<sup>28,29</sup>, John C. Chambers<sup>30,31,32</sup>, Juliana C. Chan<sup>33</sup>, Katherine R. Chao<sup>6</sup>, Sinéad Chapman<sup>6,7,34</sup>, Daniel Chasman<sup>4,35</sup>, Rex Chisholm<sup>36</sup>, Judy Cho<sup>20</sup>, Rajiv Chowdhury<sup>37</sup>, Mina K. Chung<sup>38</sup>, Wendy Chung<sup>39,40,41</sup>, Kristian Cibulskis<sup>12</sup>, Bruce Cohen<sup>35,42</sup>, Ryan L. Collins<sup>6,27,43</sup>, Kristen M. Connolly<sup>44</sup>, Adolfo Correa<sup>45</sup>, Miguel Covarrubias<sup>12</sup>, Beryl Cummings<sup>6,43</sup>, Dana Dabelea<sup>46</sup>, Mark J. Daly<sup>6,7,47</sup>, John Danesh<sup>37</sup>, Dawood Darbar<sup>48</sup>, Joshua Denny<sup>49</sup>, Stacey Donnelly<sup>6</sup>, Ravindranath Duggirala<sup>50</sup>, Josée Dupuis<sup>51,52</sup>, Patrick T. Ellinor<sup>6,53</sup>, Roberto Elosua<sup>54,55,56</sup>, James Emery<sup>12</sup>, Eleina England<sup>6</sup>, Jeanette Erdmann<sup>57,58,59</sup>, Tõnu Esko<sup>6,60</sup>, Emily Evangelista<sup>6</sup>, Yossi Farjoun<sup>12</sup>, Diane Fatkin<sup>61,62,63</sup>, Steven Ferreira<sup>64</sup>, Jose Florez<sup>35,65,66</sup>, Laurent Francioli<sup>6,7</sup>, Andre Franke<sup>67</sup>, Martti Färkkilä<sup>68</sup>, Stacey Gabriel<sup>64</sup>, Kiran Garimella<sup>12</sup>, Laura D. Gauthier<sup>12</sup>, Jeff Gentry<sup>12</sup>, Gad Getz<sup>35,69,70</sup>, David C. Glahn<sup>71,72</sup>, Benjamin Glaser<sup>73</sup>, Stephen J. Glatt<sup>74</sup>, David Goldstein<sup>75,76</sup>, Clicerio Gonzalez<sup>77</sup>, Julia Goodrich<sup>6</sup>, Leif Groop<sup>78,79</sup>, Sanna Gudmundsson<sup>6,7,80</sup>, Namrata Gupta<sup>6,64</sup>, Andrea Haessly<sup>12</sup>, Christopher Haiman<sup>81</sup>, Ira Hall<sup>82</sup>, Craig Hanis<sup>83</sup>, Matthew Harms<sup>84,85</sup>, Mikko Hiltunen<sup>86</sup>, Matti M. Holi<sup>87</sup>, Christina M. Hultman<sup>88,89</sup>, Chaim Jalas<sup>90</sup>, Thibault Jeandet<sup>12</sup>, Mikko Kallela<sup>91</sup>, Diane Kaplan<sup>12</sup>, Jaakko Kaprio<sup>79</sup>, Konrad J. Karczewski<sup>6,7,34</sup>, Sekar Kathiresan<sup>27,35,92</sup>, Eimear Kenny<sup>89,93</sup>, Bong-Jo Kim<sup>94</sup>, Young Jin Kim<sup>94</sup>, George Kirov<sup>95</sup>, Jaspal Kooner<sup>31,96,97</sup>, Seppo Koskinen<sup>98</sup>, Harlan M. Krumholz<sup>99</sup>, Subra Kugathasan<sup>100</sup>, Soo Heon Kwak<sup>101</sup>, Markku Laakso<sup>102,103</sup>, Nicole Lake<sup>104</sup>, Trevyn Langsford<sup>12</sup>, Kristen M. Laricchia<sup>6,7</sup>, Terho Lehtimäki<sup>105</sup>, Monkol Lek<sup>104</sup>, Emily Lipscomb<sup>6</sup>, Christopher Llanwarne<sup>12</sup>, Ruth J.F. Loos<sup>20,106</sup>, Steven A. Lubitz<sup>6,53</sup>, Teresa Tusie Luna<sup>107,108</sup>, Ronald C.W. Ma<sup>33,109,110</sup>, Daniel G. MacArthur<sup>6,111,112</sup>, Gregory M. Marcus<sup>113</sup>, Jaime Marrugat<sup>55,114</sup>, Kari M. Mattila<sup>105</sup>, Steven McCarroll<sup>134,115</sup>, Mark I. McCarthy<sup>116,117,118</sup>, Jacob McCauley<sup>119,120</sup>, Dermot McGovern<sup>121</sup>, Ruth McPherson<sup>122</sup>, James B. Meigs<sup>6,35,123</sup>, Olle Melander<sup>124</sup>, Andres Metspalu<sup>125</sup>, Deborah Meyers<sup>126</sup>, Eric V. Minikel<sup>6</sup>, Braxton Mitchell<sup>127</sup>, Vamsi K. Mootha<sup>6,128</sup>, Ruchi Munshi<sup>12</sup>, Aliya Naheed<sup>129</sup>, Saman Nazarian<sup>130,131</sup>, Benjamin M. Neale<sup>6,7</sup>, Peter M. Nilsson<sup>132</sup>, Sam Novod<sup>12</sup>, Anne H. O'Donnell-Luria<sup>6,7,80</sup>, Michael C. O'Donovan<sup>95</sup>, Yukinori Okada<sup>133,134,135</sup>, Dost Ongur<sup>35,42</sup>, Lorena Orozco<sup>136</sup>, Michael J. Owen<sup>95</sup>, Colin Palmer<sup>137</sup>, Nicholette D. Palmer<sup>138</sup>, Aarno Palotie<sup>7,34,79</sup>, Kyong Soo Park<sup>101,139</sup>, Carlos Pato<sup>140</sup>, Nikelle Petrillo<sup>12</sup>, William Phu<sup>6,80</sup>, Timothy Poterba<sup>6,7,34</sup>, Ann E. Pulver<sup>141</sup>, Dan Rader<sup>130,142</sup>, Nazneen Rahman<sup>143</sup>, Heidi Rehm<sup>6,27</sup>, Alex Reiner<sup>144,145</sup>, Anne M. Remes<sup>146</sup>, Dan Rhodes<sup>6</sup>, Stephen Rich<sup>147,148</sup>, John D. Rioux<sup>149,150</sup>, Samuli Ripatti<sup>79,151,152</sup>, David Roazen<sup>12</sup>, Dan M. Roden<sup>153,154</sup>, Jerome I. Rotter<sup>155</sup>, Valentin Ruano-Rubio<sup>12</sup>, Nareh Sahakian<sup>12</sup>, Danish Saleheen<sup>156,157,158</sup>, Veikko Salomaa<sup>159</sup>, Andrea Saltzman<sup>6</sup>, Nilesh J. Samani<sup>24,25</sup>, Kaitlin E. Samocha<sup>160</sup>, Jeremiah Scharf<sup>6,27,34</sup>, Molly Schleicher<sup>6</sup>, Heribert Schunkert<sup>161,162</sup>, Sebastian Schönher<sup>163</sup>, Eleanor Seaby<sup>6</sup>, Cotton Seed<sup>7,34</sup>, Svati H. Shah<sup>164</sup>, Megan Shand<sup>12</sup>, Moore B. Shoemaker<sup>165</sup>, Tai Shyong<sup>166,167</sup>, Edwin K. Silverman<sup>168,169</sup>, Moriel Singer-Berk<sup>6</sup>, Pamela Sklar<sup>170,171,172</sup>, J. Gustav Smith<sup>152,173,174</sup>, Jonathan T. Smith<sup>12</sup>, Hilkka Soininen<sup>175</sup>, Harry Sokol<sup>176,177,178</sup>, Matthew Solomonson<sup>6,7</sup>, Rachel G. Son<sup>6</sup>, Jose Soto<sup>12</sup>, Tim Spector<sup>179</sup>, Christine Stevens<sup>6,7,34</sup>, Nathan Stitzel<sup>182,180</sup>, Patrick F. Sullivan<sup>88,181</sup>, Jaana Suvisaari<sup>159</sup>, E. Shyong Tai<sup>182,183,184</sup>, Michael E. Talkowski<sup>6,27,34</sup>, Yekaterina Tarasova<sup>6</sup>, Kent D. Taylor<sup>155</sup>, Yik Ying Teo<sup>182,185,186</sup>, Grace Tiao<sup>6,7</sup>, Kathleen Tibbetts<sup>12</sup>, Charlotte Tolonen<sup>12</sup>, Ming Tsuang<sup>187,188</sup>, Tiinamaija Tuomi<sup>79,189,190</sup>, Dan Turner<sup>191</sup>, Teresa Tusie-Luna<sup>192,193</sup>, Erkki Vartiainen<sup>194</sup>, Marquis Vawter<sup>195</sup>, Christopher Vittal<sup>6,7</sup>, Gordon Wade<sup>12</sup>, Arcturus Wang<sup>6,7,34</sup>, Qingbo Wang<sup>6,133</sup>, James S. Ware<sup>6,196,197</sup>, Hugh Watkins<sup>198</sup>, Nicholas A. Watts<sup>6,7</sup>, Rinse K. Weersma<sup>199</sup>, Ben Weisburd<sup>12</sup>, Maija Wessman<sup>79,200</sup>, Nicola Whiffin<sup>6,201,202</sup>, Michael W. Wilson<sup>6,7</sup>, James G. Wilson<sup>203</sup>, Ramnik J. Xavier<sup>204,205</sup>

<sup>1</sup>University of Miami Miller School of Medicine, Gastroenterology, Miami, USA

<sup>2</sup>Unidad de Investigacion de Enfermedades Metabolicas, Instituto Nacional de Ciencias Medicas y Nutricion, Mexico City, Mexico



- <sup>3</sup>Peninsula College of Medicine and Dentistry, Exeter, UK
- <sup>4</sup>Division of Preventive Medicine, Brigham and Women's Hospital, Boston, MA, USA
- <sup>5</sup>Division of Cardiovascular Medicine, Brigham and Women's Hospital and Harvard Medical School, Boston, MA, USA
- <sup>6</sup>Program in Medical and Population Genetics, Broad Institute of MIT and Harvard, Cambridge, MA, USA
- <sup>7</sup>Analytic and Translational Genetics Unit, Massachusetts General Hospital, Boston, MA, USA
- <sup>8</sup>Department of Cardiology University Hospital, Parma, Italy
- <sup>9</sup>European Molecular Biology Laboratory, European Bioinformatics Institute, Wellcome Genome Campus, Hinxton, Cambridge, UK
- <sup>10</sup>Department of Biology Faculty of Natural Sciences, University of Haifa, Haifa, Israel
- <sup>11</sup>Departments of Medicine and Genetics, Albert Einstein College of Medicine, Bronx, NY, USA
- <sup>12</sup>Data Science Platform, Broad Institute of MIT and Harvard, Cambridge, MA, USA
- <sup>13</sup>Department of Quantitative Health Sciences, Lerner Research Institute Cleveland Clinic, Cleveland, OH, USA
- <sup>14</sup>Sorbonne Université, APHP, Gastroenterology Department Saint Antoine Hospital, Paris, France
- <sup>15</sup>NHLBI and Boston University's Framingham Heart Study, Framingham, MA, USA
- <sup>16</sup>Department of Medicine, Boston University School of Medicine, Boston, MA, USA
- <sup>17</sup>Department of Epidemiology, Boston University School of Public Health, Boston, MA, USA
- <sup>18</sup>Department of Biostatistics and Center for Statistical Genetics, University of Michigan, Ann Arbor, MI, USA
- <sup>19</sup>National Human Genome Research Institute, National Institutes of Health Bethesda, MD, USA
- <sup>20</sup>The Charles Bronfman Institute for Personalized Medicine, Icahn School of Medicine at Mount Sinai, New York, NY, USA
- <sup>21</sup>Department of Biochemistry, Wake Forest School of Medicine, Winston-Salem, NC, USA
- <sup>22</sup>Center for Genomics and Personalized Medicine Research, Wake Forest School of Medicine, Winston-Salem, NC, USA
- <sup>23</sup>Center for Diabetes Research, Wake Forest School of Medicine, Winston-Salem, NC, USA
- <sup>24</sup>Department of Cardiovascular Sciences, University of Leicester, Leicester, UK
- <sup>25</sup>NIHR Leicester Biomedical Research Centre, Glenfield Hospital, Leicester, UK
- <sup>26</sup>John Hopkins Bloomberg School of Public Health, Baltimore, MD, USA
- <sup>27</sup>Center for Genomic Medicine, Massachusetts General Hospital, Boston, MA, USA
- <sup>28</sup>Harvard School of Public Health, Boston, MA, USA
- <sup>29</sup>Central American Population Center, San Pedro, Costa Rica
- <sup>30</sup>Department of Epidemiology and Biostatistics, Imperial College London, London, UK
- <sup>31</sup>Department of Cardiology, Ealing Hospital, NHS Trust, Southall, UK
- <sup>32</sup>Imperial College, Healthcare NHS Trust Imperial College London, London, UK
- <sup>33</sup>Department of Medicine and Therapeutics, The Chinese University of Hong Kong, Hong Kong, China
- <sup>34</sup>Stanley Center for Psychiatric Research, Broad Institute of MIT and Harvard, Cambridge, MA, USA
- <sup>35</sup>Department of Medicine, Harvard Medical School, Boston, MA, USA
- <sup>36</sup>Northwestern University, Evanston, IL, USA
- <sup>37</sup>University of Cambridge, Cambridge, England
- <sup>38</sup>Departments of Cardiovascular, Medicine Cellular and Molecular Medicine Molecular Cardiology, Quantitative Health Sciences, Cleveland Clinic, Cleveland, OH, USA
- <sup>39</sup>Department of Pediatrics, Columbia University Irving Medical Center, New York, NY, USA
- <sup>40</sup>Herbert Irving Comprehensive Cancer Center, Columbia University Medical Center, New York, NY, USA
- <sup>41</sup>Department of Medicine, Columbia University Medical Center, New York, NY, USA
- <sup>42</sup>McLean Hospital, Belmont, MA, USA
- <sup>43</sup>Division of Medical Sciences, Harvard Medical School, Boston, MA, USA
- <sup>44</sup>Genomics Platform, Broad Institute of MIT and Harvard, Cambridge, MA, USA

- <sup>45</sup>Department of Medicine, University of Mississippi Medical Center, Jackson, MI, USA
- <sup>46</sup>Department of Epidemiology Colorado School of Public Health Aurora, CO, USA
- <sup>47</sup>Institute for Molecular Medicine Finland, (FIMM) Helsinki, Finland
- <sup>48</sup>Department of Medicine and Pharmacology, University of Illinois at Chicago, Chicago, IL, USA
- <sup>49</sup>Vanderbilt University Medical Center, Nashville, TN, USA
- <sup>50</sup>Department of Genetics, Texas Biomedical Research Institute, San Antonio, TX, USA
- <sup>51</sup>Department of Biostatistics, Boston University School of Public Health, Boston, MA, USA
- <sup>52</sup>National Heart Lung and Blood Institute's Framingham Heart Study, Framingham, MA, USA
- <sup>53</sup>Cardiac Arrhythmia Service and Cardiovascular Research Center, Massachusetts General Hospital, Boston, MA, USA
- <sup>54</sup>Cardiovascular Epidemiology and Genetics Hospital del Mar Medical Research Institute, (IMIM) Barcelona Catalonia, Spain
- <sup>55</sup>CIBER CV Barcelona, Catalonia, Spain
- <sup>56</sup>Department of Medicine, Medical School University of Vic-Central, University of Catalonia, Vic Catalonia, Spain
- <sup>57</sup>Institute for Cardiogenetics, University of Lübeck, Lübeck, Germany
- <sup>58</sup>German Research Centre for Cardiovascular Research, Hamburg/Lübeck/Kiel, Lübeck, Germany
- <sup>59</sup>University Heart Center Lübeck, Lübeck, Germany
- <sup>60</sup>Estonian Genome Center, Institute of Genomics University of Tartu, Tartu, Estonia
- <sup>61</sup>Victor Chang Cardiac Research Institute, Darlinghurst, NSW, Australia
- <sup>62</sup>Faculty of Medicine, UNSW Sydney, Kensington, NSW, Australia
- <sup>63</sup>Cardiology Department, St Vincent's Hospital, Darlinghurst, NSW, Australia
- <sup>64</sup>Broad Genomics, Broad Institute of MIT and Harvard, Cambridge, MA, USA
- <sup>65</sup>Diabetes Unit and Center for Genomic Medicine, Massachusetts General Hospital, Boston, MA, USA
- <sup>66</sup>Programs in Metabolism and Medical & Population Genetics, Broad Institute of MIT and Harvard, Cambridge, MA, USA
- <sup>67</sup>Institute of Clinical Molecular Biology, (IKMB) Christian-Albrechts-University of Kiel, Kiel, Germany
- <sup>68</sup>Helsinki University and Helsinki University Hospital Clinic of Gastroenterology, Helsinki, Finland
- <sup>69</sup>Bioinformatics Program MGH Cancer Center and Department of Pathology, Boston, MA, USA
- <sup>70</sup>Cancer Genome Computational Analysis, Broad Institute of MIT and Harvard, Cambridge, MA, USA
- <sup>71</sup>Department of Psychiatry and Behavioral Sciences, Boston Children's Hospital and Harvard Medical School, Boston, MA, USA
- <sup>72</sup>Harvard Medical School Teaching Hospital, Boston, MA, USA
- <sup>73</sup>Department of Endocrinology and Metabolism, Hadassah Medical Center and Faculty of Medicine, Hebrew University of Jerusalem, Israel
- <sup>74</sup>Department of Psychiatry and Behavioral Sciences, SUNY Upstate Medical University, Syracuse, NY, USA
- <sup>75</sup>Institute for Genomic Medicine, Columbia University Medical Center Hammer Health Sciences, New York, NY, USA
- <sup>76</sup>Department of Genetics & Development Columbia University Medical Center, Hammer Health Sciences, New York, NY, USA
- <sup>77</sup>Centro de Investigacion en Salud Poblacional, Instituto Nacional de Salud Publica, Mexico
- <sup>78</sup>Lund University Sweden, Sweden
- <sup>79</sup>Institute for Molecular Medicine Finland, (FIMM) HiLIFE University of Helsinki, Helsinki, Finland
- <sup>80</sup>Division of Genetics and Genomics, Boston Children's Hospital, Boston, MA, USA
- <sup>81</sup>Lund University Diabetes Centre, Malmö, Skåne County, Sweden
- <sup>82</sup>Washington School of Medicine, St Louis, MI, USA
- <sup>83</sup>Human Genetics Center University of Texas Health Science Center at Houston, Houston, TX, USA
- <sup>84</sup>Department of Neurology Columbia University, New York City, NY, USA
- <sup>85</sup>Institute of Genomic Medicine, Columbia University, New York City, NY, USA
- <sup>86</sup>Institute of Biomedicine, University of Eastern Finland, Kuopio, Finland

- <sup>87</sup>Department of Psychiatry, Helsinki University Central Hospital Lapinlahdentie, Helsinki, Finland
- <sup>88</sup>Department of Medical Epidemiology and Biostatistics, Karolinska Institutet, Stockholm, Sweden
- <sup>89</sup>Icahn School of Medicine at Mount Sinai, New York, NY, USA
- <sup>90</sup>Bonei Olam, Center for Rare Jewish Genetic Diseases, Brooklyn, NY, USA
- <sup>91</sup>Department of Neurology, Helsinki University, Central Hospital, Helsinki, Finland
- <sup>92</sup>Cardiovascular Disease Initiative and Program in Medical and Population Genetics, Broad Institute of MIT and Harvard, Cambridge, MA, USA
- <sup>93</sup>Charles Bronfman Institute for Personalized Medicine, New York, NY, USA
- <sup>94</sup>Division of Genome Science, Department of Precision Medicine, National Institute of Health, Republic of Korea
- <sup>95</sup>MRC Centre for Neuropsychiatric Genetics & Genomics, Cardiff University School of Medicine, Cardiff, Wales
- <sup>96</sup>Imperial College, Healthcare NHS Trust, London, UK
- <sup>97</sup>National Heart and Lung Institute Cardiovascular Sciences, Hammersmith Campus, Imperial College London, London, UK
- <sup>98</sup>Department of Health THL-National Institute for Health and Welfare, Helsinki, Finland
- <sup>99</sup>Section of Cardiovascular Medicine, Department of Internal Medicine, Yale School of Medicine, Center for Outcomes Research and Evaluation Yale-New Haven Hospital, New Haven, CT, USA
- <sup>100</sup>Division of Pediatric Gastroenterology, Emory University School of Medicine, Atlanta, GA, USA
- <sup>101</sup>Department of Internal Medicine, Seoul National University Hospital, Seoul, Republic of Korea
- <sup>102</sup>The University of Eastern Finland, Institute of Clinical Medicine, Kuopio, Finland
- <sup>103</sup>Kuopio University Hospital, Kuopio, Finland
- <sup>104</sup>Department of Genetics, Yale School of Medicine, New Haven, CT, USA
- <sup>105</sup>Department of Clinical Chemistry Fimlab Laboratories and Finnish Cardiovascular Research Center-Tampere Faculty of Medicine and Health Technology, Tampere University, Finland
- <sup>106</sup>The Mindich Child Health and Development, Institute Icahn School of Medicine at Mount Sinai, New York, NY, USA
- <sup>107</sup>National Autonomous University of Mexico, Mexico City, Mexico
- <sup>108</sup>Salvador Zubirán National Institute of Health Sciences and Nutrition, Mexico City, Mexico
- <sup>109</sup>Li Ka Shing Institute of Health Sciences, The Chinese University of Hong Kong, Hong Kong, China
- <sup>110</sup>Hong Kong Institute of Diabetes and Obesity, The Chinese University of Hong Kong, Hong Kong, China
- <sup>111</sup>Centre for Population Genomics, Garvan Institute of Medical Research and UNSW Sydney, Sydney, Australia
- <sup>112</sup>Centre for Population Genomics, Murdoch Children's Research Institute, Melbourne, Australia
- <sup>113</sup>University of California San Francisco Parnassus Campus, San Francisco, CA, USA
- <sup>114</sup>Cardiovascular Research REGICOR Group, Hospital del Mar Medical Research Institute, (IMIM) Barcelona, Catalonia, Spain
- <sup>115</sup>Department of Genetics, Harvard Medical School, Boston, MA, USA
- <sup>116</sup>Oxford Centre for Diabetes, Endocrinology and Metabolism, University of Oxford, Churchill Hospital Old Road Headington, Oxford, OX, LJ, UK
- <sup>117</sup>Wellcome Centre for Human Genetics, University of Oxford, Oxford, OX, BN, UK
- <sup>118</sup>Oxford NIHR Biomedical Research Centre, Oxford University Hospitals, NHS Foundation Trust, John Radcliffe Hospital, Oxford, OX, DU, UK
- <sup>119</sup>John P. Hussman Institute for Human Genomics, Leonard M. Miller School of Medicine, University of Miami, Miami, FL, USA
- <sup>120</sup>The Dr. John T. Macdonald Foundation Department of Human Genetics, Leonard M. Miller School of Medicine, University of Miami, Miami, FL, USA
- <sup>121</sup>F. Widjaja Foundation Inflammatory Bowel and Immunobiology Research Institute Cedars-Sinai Medical Center, Los Angeles, CA, USA
- <sup>122</sup>Atherogenomics Laboratory University of Ottawa, Heart Institute, Ottawa, Canada

- <sup>123</sup>Division of General Internal Medicine, Massachusetts General Hospital, Boston, MA, USA
- <sup>124</sup>Department of Clinical Sciences University, Hospital Malmö Clinical Research Center, Lund University, Malmö, Sweden
- <sup>125</sup>Estonian Genome Center, Institute of Genomics, University of Tartu, Tartu, Estonia
- <sup>126</sup>University of Arizona Health Science, Tucson, AZ, USA
- <sup>127</sup>University of Maryland School of Medicine, Baltimore, MD, USA
- <sup>128</sup>Howard Hughes Medical Institute and Department of Molecular Biology, Massachusetts General Hospital, Boston, MA, USA
- <sup>129</sup>International Centre for Diarrhoeal Disease Research, Bangladesh
- <sup>130</sup>Perelman School of Medicine, University of Pennsylvania, Philadelphia, PA, USA
- <sup>131</sup>Johns Hopkins Bloomberg School of Public Health, Baltimore, MD, USA
- <sup>132</sup>Lund University, Dept. Clinical Sciences, Skåne University Hospital, Malmö, Sweden
- <sup>133</sup>Department of Statistical Genetics, Osaka University Graduate School of Medicine, Suita, Japan
- <sup>134</sup>Laboratory of Statistical Immunology, Immunology Frontier Research Center (WPI-IFReC), Osaka University, Suita, Japan
- <sup>135</sup>Integrated Frontier Research for Medical Science Division, Institute for Open and Transdisciplinary Research Initiatives, Osaka University, Suita, Japan
- <sup>136</sup>Instituto Nacional de Medicina Genómica, (INMEGEN) Mexico City, Mexico
- <sup>137</sup>Medical Research Institute, Ninewells Hospital and Medical School University of Dundee, Dundee, UK
- <sup>138</sup>Wake Forest School of Medicine, Winston-Salem, NC, USA
- <sup>139</sup>Department of Molecular Medicine and Biopharmaceutical Sciences, Graduate School of Convergence Science and Technology, Seoul National University, Seoul, Republic of Korea
- <sup>140</sup>Department of Psychiatry Keck School of Medicine at the University of Southern California, Los Angeles, CA, USA
- <sup>141</sup>Department of Psychiatry and Behavioral Sciences, Johns Hopkins University School of Medicine, Baltimore, MD, USA
- <sup>142</sup>Children's Hospital of Philadelphia, Philadelphia, PA, USA
- <sup>143</sup>Division of Genetics and Epidemiology, Institute of Cancer Research, London, SM, NG
- <sup>144</sup>University of Washington, Seattle, WA, USA
- <sup>145</sup>Fred Hutchinson Cancer Research Center, Seattle, WA, USA
- <sup>146</sup>Medical Research Center, Oulu University Hospital, Oulu Finland and Research Unit of Clinical Neuroscience Neurology University of Oulu, Oulu, Finland
- <sup>147</sup>Center for Public Health Genomics, University of Virginia, Charlottesville, VA, USA
- <sup>148</sup>Department of Public Health Sciences, University of Virginia, Charlottesville, VA, USA
- <sup>149</sup>Research Center Montreal Heart Institute, Montreal, Quebec, Canada
- <sup>150</sup>Department of Medicine, Faculty of Medicine Université de Montréal, Québec, Canada
- <sup>151</sup>Department of Public Health Faculty of Medicine, University of Helsinki, Helsinki, Finland
- <sup>152</sup>Broad Institute of MIT and Harvard, Cambridge, MA, USA
- <sup>153</sup>Department of Biomedical Informatics Vanderbilt, University Medical Center, Nashville, TN, USA
- <sup>154</sup>Department of Medicine, Vanderbilt University Medical Center, Nashville, TN, USA
- <sup>155</sup>The Institute for Translational Genomics and Population Sciences, Department of Pediatrics, The Lundquist Institute for Biomedical Innovation at Harbor-UCLA Medical Center, Torrance, CA, USA
- <sup>156</sup>Department of Biostatistics and Epidemiology, Perelman School of Medicine, University of Pennsylvania, Philadelphia, PA, USA
- <sup>157</sup>Department of Medicine, Perelman School of Medicine at the University of Pennsylvania, Philadelphia, PA, USA
- <sup>158</sup>Center for Non-Communicable Diseases, Karachi, Pakistan
- <sup>159</sup>National Institute for Health and Welfare, Helsinki, Finland
- <sup>160</sup>Wellcome Sanger Institute, Wellcome Genome Campus, Hinxton, Cambridge, UK
- <sup>161</sup>Deutsches Herzzentrum, München, Germany

- <sup>162</sup>Technische Universität München, Germany
- <sup>163</sup>Institute of Genetic Epidemiology, Department of Genetics and Pharmacology, Medical University of Innsbruck, 6020 Innsbruck, Austria
- <sup>164</sup>Duke Molecular Physiology Institute, Durham, NC
- <sup>165</sup>Division of Cardiovascular Medicine, Nashville VA Medical Center, Vanderbilt University School of Medicine, Nashville, TN, USA
- <sup>166</sup>Division of Endocrinology, National University Hospital, Singapore
- <sup>167</sup>NUS Saw Swee Hock School of Public Health, Singapore
- <sup>168</sup>Channing Division of Network Medicine, Brigham and Women's Hospital, Boston, MA, USA
- <sup>169</sup>Harvard Medical School, Boston, MA, USA
- <sup>170</sup>Department of Psychiatry, Icahn School of Medicine at Mount Sinai, New York, NY, USA
- <sup>171</sup>Department of Genetics and Genomic Sciences, Icahn School of Medicine at Mount Sinai, New York, NY, USA
- <sup>172</sup>Institute for Genomics and Multiscale Biology, Icahn School of Medicine at Mount Sinai, New York, NY, USA
- <sup>173</sup>The Wallenberg Laboratory/Department of Molecular and Clinical Medicine, Institute of Medicine, Gothenburg University and the Department of Cardiology, Sahlgrenska University Hospital, Gothenburg, Sweden
- <sup>174</sup>Department of Cardiology, Wallenberg Center for Molecular Medicine and Lund University Diabetes Center, Clinical Sciences, Lund University and Skåne University Hospital, Lund, Sweden
- <sup>175</sup>Institute of Clinical Medicine Neurology, University of Eastern Finland, Kuopio, Finland
- <sup>176</sup>Sorbonne Université, INSERM, Centre de Recherche Saint-Antoine, CRSA, AP-HP, Saint Antoine Hospital, Gastroenterology department, F-75012 Paris, France
- <sup>177</sup>INRA, UMR1319 Micalis & AgroParisTech, Jouy en Josas, France
- <sup>178</sup>Paris Center for Microbiome Medicine, (PaCeMM) FHU, Paris, France
- <sup>179</sup>Department of Twin Research and Genetic Epidemiology King's College London, London, UK
- <sup>180</sup>The McDonnell Genome Institute at Washington University, Seattle, WA, USA
- <sup>181</sup>Departments of Genetics and Psychiatry, University of North Carolina, Chapel Hill, NC, USA
- <sup>182</sup>Saw Swee Hock School of Public Health National University of Singapore, National University Health System, Singapore
- <sup>183</sup>Department of Medicine, Yong Loo Lin School of Medicine National University of Singapore, Singapore
- <sup>184</sup>Duke-NUS Graduate Medical School, Singapore
- <sup>185</sup>Life Sciences Institute, National University of Singapore, Singapore
- <sup>186</sup>Department of Statistics and Applied Probability, National University of Singapore, Singapore
- <sup>187</sup>Center for Behavioral Genomics, Department of Psychiatry, University of California, San Diego, CA, USA
- <sup>188</sup>Institute of Genomic Medicine, University of California San Diego, San Diego, CA, USA
- <sup>189</sup>Endocrinology, Abdominal Center, Helsinki University Hospital, Helsinki, Finland
- <sup>190</sup>Institute of Genetics, Folkhalsan Research Center, Helsinki, Finland
- <sup>191</sup>Juliet Keidan Institute of Pediatric Gastroenterology Shaare Zedek Medical Center, The Hebrew University of Jerusalem, Jerusalem, Israel
- <sup>192</sup>Instituto de Investigaciones Biomédicas, UNAM, Mexico City, Mexico
- <sup>193</sup>Instituto Nacional de Ciencias Médicas y Nutrición Salvador Zubirán, Mexico City, Mexico
- <sup>194</sup>Department of Public Health Faculty of Medicine University of Helsinki, Helsinki, Finland
- <sup>195</sup>Department of Psychiatry and Human Behavior, University of California Irvine, Irvine, CA, USA
- <sup>196</sup>National Heart & Lung Institute & MRC London Institute of Medical Sciences, Imperial College, London, UK
- <sup>197</sup>Cardiovascular Research Centre Royal Brompton & Harefield Hospitals, London, UK
- <sup>198</sup>Radcliffe Department of Medicine, University of Oxford, Oxford, UK

<sup>199</sup>Department of Gastroenterology and Hepatology, University of Groningen and University Medical Center Groningen, Groningen, Netherlands

<sup>200</sup>Folkhälsan Institute of Genetics, Folkhälsan Research Center, Helsinki, Finland

<sup>201</sup>National Heart & Lung Institute and MRC London Institute of Medical Sciences, Imperial College London, London, UK

<sup>202</sup>Cardiovascular Research Centre, Royal Brompton & Harefield Hospitals NHS Trust, London, UK

<sup>203</sup>Department of Physiology and Biophysics, University of Mississippi Medical Center, Jackson, MS, USA

<sup>204</sup>Program in Infectious Disease and Microbiome, Broad Institute of MIT and Harvard, Cambridge, MA, USA

<sup>205</sup>Center for Computational and Integrative Biology, Massachusetts General Hospital, Boston, MA, USA

Genome Aggregation Database Consortium Authors received funding as follows:

- Matthew J. Bown: British Heart Foundation awards CS/14/2/30841 and RG/18/10/33842
- Josée Dupuis: National Heart Lung and Blood Institute's Framingham Heart Study Contract (HHSNI); National Institute for Diabetes and Digestive and Kidney Diseases (NIDDK) R DK
- Martti Färkkilä: State funding for university level health research
- Laura D. Gauthier: Intel, Illumina
- Stephen J. Glatt: U.S. NIMH Grant R MH
- Leif Groop: The Academy of Finland and University of Helsinki: Center of Excellence for Complex Disease Genetics (grant number 312063 and 336822), Sigrid Jusélius Foundation; IMI 2 (grant No 115974 and 15881)
- Mikko Hiltunen: Academy of Finland (grant 338182) Sigrid Jusélius Foundation the Strategic Neuroscience Funding of the University of Eastern Finland
- Chaim Jalas: Bonei Olam
- Jaakko Kaprio: Academy of Finland (grants 312073 and 336823)
- Jacob McCauley: National Institute of Diabetes and Digestive and Kidney Disease Grant R01DK104844
- Yukinori Okada: JSPS KAKENHI (19H01021, 20K21834), AMED (JP21km0405211, JP21ek0109413, JP21gm4010006, JP21km0405217, JP21ek0410075), JST Moonshot R&D (JPMJMS2021)
- Michael J. Owen: Medical Research Council UK: Centre Grant No. MR/L010305/1, Program Grant No. G0800509
- Aarno Palotie: the Academy of Finland Center of Excellence for Complex Disease Genetics (grant numbers 312074 and 336824) and Sigrid Jusélius Foundation
- John D. Rioux: National Institute of Diabetes and Digestive and Kidney Diseases (NIDDK; DK062432), from the Canadian Institutes of Health (CIHR GPG 102170), from Genome Canada/Génomique Québec (GPH-129341), and a Canada Research Chair (#230625)
- Samuli Ripatti: the Academy of Finland Center of Excellence for Complex Disease Genetics (grant number ) Sigrid Jusélius Foundation

- Jerome I. Rotter: Trans-Omics in Precision Medicine (TOPMed) program was supported by the National Heart, Lung and Blood Institute (NHLBI). WGS for “NHLBI TOPMed: Multi-Ethnic Study of Atherosclerosis (MESA)” (phs001416.v1.p1) was performed at the Broad Institute of MIT and Harvard (3U54HG003067-13S1). Core support including centralized genomic read mapping and genotype calling, along with variant quality metrics and filtering were provided by the TOPMed Informatics Research Center (3R01HL-117626-02S1; contract HHSN268201800002I). Core support including phenotype harmonization, data management, sample-identity QC, and general program coordination were provided by the TOPMed Data Coordinating Center (R01HL-120393; U01HL-120393; contract HHSN268201800001I). We gratefully acknowledge the studies and participants who provided biological samples and data for MESA and TOPMed. JSK was supported by the Pulmonary Fibrosis Foundation Scholars Award and grant K23-HL-150301 from the NHLBI. MRA was supported by grant K23-HL-150280, AJP was supported by grant K23-HL-140199, and AM was supported by R01-HL131565 from the NHLBI. EJB was supported by grant K23-AR-075112 from the National Institute of Arthritis and Musculoskeletal and Skin Diseases. The MESA project is conducted and supported by the National Heart, Lung, and Blood Institute (NHLBI) in collaboration with MESA investigators. Support for MESA is provided by contracts 75N92020D00001, HHSN268201500003I, N01-HC-95159, 75N92020D00005, N01-HC-95160, 75N92020D00002, N01-HC-95161, 75N92020D00003, N01-HC-95162, 75N92020D00006, N01-HC-95163, 75N92020D00004, N01-HC-95164, 75N92020D00007, N01-HC-95165, N01-HC-95166, N01-HC-95167, N01-HC-95168, N01-HC-95169, UL1-TR-000040, UL1-TR-001079, and UL1-TR-001420. Also supported in part by the National Center for Advancing Translational Sciences, CTSI grant UL1TR001881, and the National Institute of Diabetes and Digestive and Kidney Disease Diabetes Research Center (DRC) grant DK063491 to the Southern California Diabetes Endocrinology Research Center
- Edwin K. Silverman: NIH Grants U01 HL089856 and U01 HL089897
- J. Gustav Smith: The Swedish Heart-Lung Foundation (2019-0526), the Swedish Research Council (2017-02554), the European Research Council (ERC-STG-2015-679242), Skåne University Hospital, governmental funding of clinical research within the Swedish National Health Service, a generous donation from the Knut and Alice Wallenberg foundation to the Wallenberg Center for Molecular Medicine in Lund, and funding from the Swedish Research Council (Linnaeus grant Dnr 349-2006-237, Strategic Research Area Exodiab Dnr 2009-1039) and Swedish Foundation for Strategic Research (Dnr IRC15-0067) to the Lund University Diabetes Center
- Kent D. Taylor: Trans-Omics in Precision Medicine (TOPMed) program was supported by the National Heart, Lung and Blood Institute (NHLBI). WGS for “NHLBI TOPMed: Multi-Ethnic Study of Atherosclerosis (MESA)” (phs001416.v1.p1) was performed at the Broad Institute of MIT and Harvard (3U54HG003067-13S1). Core support including centralized genomic read mapping and genotype calling, along with variant quality metrics and filtering were provided by the TOPMed Informatics Research Center (3R01HL-117626-02S1; contract HHSN268201800002I). Core support including phenotype harmonization, data management, sample-identity QC, and general program coordination were provided by the TOPMed Data Coordinating Center (R01HL-120393; U01HL-120393; contract HHSN268201800001I). We gratefully acknowledge the studies and participants who provided biological samples and data for MESA and TOPMed. JSK was supported by the Pulmonary Fibrosis Foundation Scholars Award and grant K23-HL-150301 from the NHLBI. MRA was supported by grant K23-HL-150280, AJP was supported by grant K23-HL-140199, and AM was supported by R01-HL131565 from the NHLBI. EJB was supported by grant K23-AR-075112 from the National Institute of Arthritis and Musculoskeletal and Skin Diseases. The MESA project is conducted and supported by the National Heart, Lung, and Blood Institute (NHLBI) in collaboration with MESA investigators.

Support for MESA is provided by contracts 75N92020D00001, HHSN268201500003I, N01-HC-95159, 75N92020D00005, N01-HC-95160, 75N92020D00002, N01-HC-95161, 75N92020D00003, N01-HC-95162, 75N92020D00006, N01-HC-95163, 75N92020D00004, N01-HC-95164, 75N92020D00007, N01-HC-95165, N01-HC-95166, N01-HC-95167, N01-HC-95168, N01-HC-95169, UL1-TR-000040, UL1-TR-001079, and UL1-TR-001420. Also supported in part by the National Center for Advancing Translational Sciences, CTSI grant UL1TR001881, and the National Institute of Diabetes and Digestive and Kidney Disease Diabetes Research Center (DRC) grant DK063491 to the Southern California Diabetes Endocrinology Research Center

- Tiinamaija Tuomi: The Academy of Finland and University of Helsinki: Center of Excellence for Complex Disease Genetics (grant number 312072 and 336826 ), Folkhalsan Research Foundation, Helsinki University Hospital, Ollqvist Foundation, Liv och Halsä foundation; NovoNordisk Foundation
- Teresa Tusie-Luna: CONACyT Project 312688
- James S. Ware: Wellcome Trust [107469/Z/15/Z], Medical Research Council (UK), NIHR Imperial College Biomedical Research Centre
- Rinse K. Weersma: The Lifelines Biobank initiative has been made possible by subsidy from the Dutch Ministry of Health Welfare and Sport the Dutch Ministry of Economic Affairs the University Medical Centre Groningen (UMCG the Netherlands ) the University of Groningen and the Northern Provinces of the Netherlands

No conflicts of interest to declare
