# Supplementary material for: Mitochondrial DNA variation across 56,434 individuals in gnomAD
Source: HighWire-hosted journal article supplement (doi:10.1101/gr.276013.121), 2022-01-24
Supplement: Supplemental_Table_S1.xlsx [file Supplemental_Table_S1.xlsx]

## Sheet: README
Supplemental Table S1 - NUMT-Derived False Positives.
Details on the 25 NUMT-FP sites validated by PacBio (tab 1), all 124 common heteroplasmic variants (tab 2), and co-occurrence of 67 common heteroplasmies that correlated with 1/(1+mtCN) (tab 3).
Below are descriptions for each tab
NUMT-FPs	Description	Variants validated as NUMT-FPs using PacBio data
	Columns
	CHROM	Variant chromosome
	POS	Variant positition within chromosome
	REF	Variant reference allele
	ALT	Variant alternerate allele
	POS.REF.ALT	Identifier based on POS.REF.ALT
	numtID	manually determined designation for NUMTs validated in PacBio long-read data
	# unfiltered variants (VAF 0-0.50)	# unfiltered variants with variant allele fraction (VAF) 0-0.50
	# PASS variants (VAF 0-0.50)	# PASS variants with variant allele fraction (VAF) 0-0.50
	# PASS variants (VAF 0.01-0.50)	# PASS variants with variant allele fraction (VAF) 0.01-0.50
	Spearman correlation (VAF vs 1/(1+mtCN))	Spearman correlation of unfiltered variants between VAF and 1/mtCN (where mtCN =2*mtDNA_mean_cov/nDNA_median_cov)
	Spearman Pval (VAF vs 1/(1+mtCN))	Spearman correlation p value of unfiltered variants between VAF and 1/mtCN (where mtCN =2*mtDNA_mean_cov/nDNA_median_cov)
	SIGNIFICANT	True if Spearman correlation > 0.45 and Bonferroni corrected pval < 1e-5
	Columns	Same as CommonHeteroplasmies table, with several additional columns:
	Minor allele frequency	# unfiltered variants detected in 70359 samples / 70359
	Position of NUMT based on PacBio data	exact location of the NUMT, based on manual review of sequences in long-read PacBio data
	FASTA of NUMT	sequence of NUMT derived from PacBio read
CommonHeteroplasmies	Description	All unfiltered variants with variant allele fraction (VAF) 0-0.50 and detected in at least 1000/70359 gnomAD v3.1 samples
	Columns
	CHROM	Variant chromosome
	POS	Variant position within chromosome
	REF	Variant reference allele
	ALT	Variant alternerate allele
	POS.REF.ALT	Identifier based on POS.REF.ALT
	numtID	manually determined designation for NUMTs validated in PacBio long-read data
	# unfiltered variants (VAF 0-0.50)	# unfiltered variants with variant allele fraction (VAF) 0-0.50
	# PASS variants (VAF 0-0.50)	# PASS variants with variant allele fraction (VAF) 0-0.50
	# PASS variants (VAF 0.01-0.50)	# PASS variants with variant allele fraction (VAF) 0.01-0.50
	Spearman correlation (VAF vs 1/(1+mtCN))	Spearman correlation of unfiltered variants between VAF and 1/mtCN (where mtCN =2*mtDNA_mean_cov/nDNA_median_cov)
	Spearman Pval (VAF vs 1/(1+mtCN))	Spearman correlation p value of unfiltered variants between VAF and 1/mtCN (where mtCN =2*mtDNA_mean_cov/nDNA_median_cov)
	SIGNIFICANT	True if Spearman correlation > 0.45 and Bonferroni corrected pval < 1e-5
Co-occuringHeteroplasmies	Description	For the 67 variants marked SIGNIFICANT=TRUE from CommonHeteroplasmies, co-occurrence of unfiltered variants VAF 0-0.5 across samples (Pearson correlation) is shown. Variants VAF 0.5-1 were replaced with NA and not used in the Pearson correlation
	Rows	67 variants ordered by position
	Columns	67 variants ordered by position
	Values	Pearson correlation between heteroplasmy values across all samples (VAF values > 0.50 replaced with NA, pairwise.complete.obs parameter used in R)
	Notes	NUMT-FPs shown in yellow (numtA) or green (numtB)
Note variant allele frequency (VAF) will be equivalent to heteroplasmy for true mtDNA variants, but may also indicate errors from sequencing or misalignment

## Sheet: NUMT-FPs
CHROM	POS	REF	ALT	POS.REF.ALT	numtID	# unfiltered variants (VAF 0-0.50)	# PASS variants (VAF 0-0.50)	# PASS variants (VAF 0.01-0.50)	# PASS homoplasmies (VAF 0.95-1.00)	Spearman correlation (VAF vs 1/mtCN)	Spearman Pval (VAF vs 1/mtCN)	SIGNIFICANT	Minor allele frequency* (column F/70359 samples)	Position of NUMT based on PacBio data	FASTA of NUMT
MT	12684	G	A	12684.G.A	numtA	30984	22461	18194	71	0.81062	0	TRUE	0.44037	871bp insertion from chrM:12361-13227 into chr21:9676568 Estimated allele freq = 0.44	>numtA from=chrM:12361-13227 to=chr21:9676568 sample=NA12891_and_NA19239 tacaaccctaaccctgacttccctaattccccccatccttaccaccctcgttaaccctaacaaaaaaaactcatacccccattatgtaaaatccattgtcgcatccacctttattatcagtctcttccccacaacaatattcatgtgcctagaccaagaagttattatctcgaactgacactgagccacaacccaaacaacccagctctccctaagcttcaaactagactacttctccataatattcatccctgtagcattgttcgttacatggtccatcatagaattctcactgtgatatataaactcagacccaaacattaatc…
MT	12705	C	T	12705.C.T	numtA	16792	15301	14322	28700	0.751554	0	TRUE	0.238662
MT	13062	A	G	13062.A.G	numtA	9955	7040	6827	3	0.756106	0	TRUE	0.141489
MT	13095	T	C	13095.T.C	numtA	13699	6506	5982	96	0.800942	0	TRUE	0.194701
MT	13105	A	G	13105.A.G	numtA	11149	5381	5107	8310	0.786663	0	TRUE	0.158459
MT	16189	T	A	16189.T.A	numtB	11245	2577	1581	20	0.719354	0	TRUE	0.159823	536bp insertion from chrM:16093-chrM:59 into chr11:49862017 Estimated allele freq =0.40	>numtB from=chrM:16093-16569,1-59 to=chr11:49862017 sample=NA12891 aaataccaaatgcatggagagctcccgtgagtggttaatagggtgatagacctgtgatccatcgtgatgtcttatttaaggggaacgtgtgggctatttagactttatggccctgaagtaggaaccagatgttggatacagttcactttagctacccccaagtgttatgggcccggagcgaggaaagtagcactcttgtgcgggatattgatttcacggaggatggtggccaagggactcctatctgaggggggtcatccgtggggacgagagaggatttgactgtaatgtgctatgtacggtaaatggctttatgtgctatgtactattaa…
MT	16218	C	T	16218.C.T	numtB	23725	7820	3913	474	0.771402	0	TRUE	0.337199
MT	16230	A	G	16230.A.G	numtB	26500	9717	4733	970	0.774065	0	TRUE	0.37664
MT	16249	T	C	16249.T.C	numtB	26582	11050	5567	721	0.768122	0	TRUE	0.377805
MT	16274	G	A	16274.G.A	numtB	27687	12823	6117	974	0.758028	0	TRUE	0.39351
MT	16278	C	T	16278.C.T	numtB	24327	12079	5774	13440	0.746203	0	TRUE	0.345755
MT	16284	A	G	16284.A.G	numtB	27877	13302	6227	241	0.756164	0	TRUE	0.396211
MT	16288	T	C	16288.T.C	numtB	27566	13471	6375	233	0.755369	0	TRUE	0.391791
MT	16290	C	T	16290.C.T	numtB	25947	12631	6051	3660	0.760553	0	TRUE	0.36878
MT	16293	A	C	16293.A.C	numtB	27812	12670	6945	45	0.737022	0	TRUE	0.395287
MT	16301	C	T	16301.C.T	numtB	25922	13325	6363	368	0.752466	0	TRUE	0.368425
MT	16311	T	C	16311.T.C	numtB	19827	11354	6314	14497	0.703824	0	TRUE	0.281798
MT	16355	C	T	16355.C.T	numtB	17456	9618	5098	1463	0.791738	0	TRUE	0.248099
MT	16356	T	C	16356.T.C	numtB	16593	9245	4942	2110	0.798473	0	TRUE	0.235833
MT	16368	T	C	16368.T.C	numtB	17718	9481	5105	628	0.802576	0	TRUE	0.251823
MT	16390	G	A	16390.G.A	numtB	16890	8931	5157	6921	0.74842	0	TRUE	0.240055
MT	16399	A	G	16399.A.G	numtB	12534	6649	4158	2386	0.786798	0	TRUE	0.178144
MT	16496	G	A	16496.G.A	numtB	13558	1436	984	14	0.833583	0	TRUE	0.192697
MT	16519	T	C	16519.T.C	numtB	5532	2908	2548	44447	0.485053	4E-316	TRUE	0.0786253
MT	16527	C	T	16527.C.T	numtB	12430	1297	918	1255	0.819164	0	TRUE	0.176665
*Note NUMT-FPs derived from the same NUMT may have different allele frequency due to position within NUMT;
Bases close to insertion site will be more likely correctly mapped (or have one mate correctly mapped and thus show strand-bias),
whereas bases in the middle of a long NUMT will be more likely to be mis-aligned to the mtDNA (and show no strand bias)
** Note also that estimated population allele frequencies may represent not just the single NUMT validated using PacBio
But could also represent additional NUMTs (in different locations) that give rise to the same NUMT-FPs.
													grep -P "numt[AB]" all.sample2var.unfiltered.annotNUMTFP.txt | awk -F "\t" '$4 >= 0.95 {print } ' | cut -f 2 | ~/perl/bin/oneoff/count_duplicates.pl

## Sheet: CommonHeteroplasmies
CHROM	POS	REF	ALT	POS.REF.ALT	numtID	# unfiltered variants (VAF 0-0.50)	# PASS variants (VAF 0-0.50)	# PASS variants (VAF 0.01-0.50)	Spearman correlation (VAF vs 1/mtCN)	Spearman Pval (VAF vs 1/mtCN)	Significant
MT	64	C	T	64.C.T		1352	505	376	0.372723	1.23607e-44	FALSE
MT	65	TG	T	65.TG.T		4127	718	458	0.388116	9.79981e-145	FALSE
MT	73	A	G	73.A.G		1405	805	532	0.440507	5.569e-66	FALSE
MT	146	T	C	146.T.C		6644	2619	1606	0.356147	3.13127e-194	FALSE
MT	150	C	T	150.C.T		1379	413	245	0.393005	1.516e-50	FALSE
MT	152	T	C	152.T.C		3567	1556	1038	0.321497	3.57725e-82	FALSE
MT	182	C	T	182.C.T		1528	423	238	0.374295	3.4918e-51	FALSE
MT	189	A	G	189.A.G		4071	1197	619	0.299448	1.05239e-83	FALSE
MT	195	T	C	195.T.C		1842	820	587	0.322949	1.68101e-43	FALSE
MT	204	T	C	204.T.C		10329	4145	2624	0.304464	3.46624e-217	FALSE
MT	318	T	C	318.T.C		5633	11	11	0.518782	0	TRUE
MT	464	A	C	464.A.C		3180	10	6	0.684772	0	TRUE
MT	493	A	C	493.A.C		2472	0	0	0.682484	0	TRUE
MT	499	G	C	499.G.C		30111	3	3	0.407966	0	FALSE
MT	503	A	C	503.A.C		8820	0	0	0.445382	0	FALSE
MT	513	G	GCA	513.G.GCA		3537	1646	1426	0.248149	9.20626e-46	FALSE
MT	513	G	GCACA	513.G.GCACA		1646	428	295	0.36343	6.36828e-43	FALSE
MT	513	GCA	G	513.GCA.G		11614	2016	1095	0.429672	0	FALSE
MT	539	T	A	539.T.A		4503	1	1	-0.469056	6.91983e-242	FALSE
MT	545	G	C	545.G.C		1177	1	1	0.627928	5.02191e-127	TRUE
MT	565	A	ACCCCCC	565.A.ACCCCCC		1067	366	366	0.439624	2.53597e-51	FALSE
MT	567	A	ACC	567.A.ACC		1717	1299	1266	0.0862707	0.00119875	FALSE
MT	567	A	ACCC	567.A.ACCC		2722	2147	2123	0.0677149	0.00117071	FALSE
MT	567	A	ACCCC	567.A.ACCCC		2758	2452	2437	-0.0592346	0.00215254	FALSE
MT	567	A	ACCCCC	567.A.ACCCCC		2380	2227	2213	0.0117688	0.569595	FALSE
MT	567	A	ACCCCCC	567.A.ACCCCCC		2106	1797	1785	0.0177958	0.417032	FALSE
MT	567	A	ACCCCCCC	567.A.ACCCCCCC		1346	625	620	0.129051	2.29795e-06	FALSE
MT	567	A	C	567.A.C		2430	1030	1029	0.217196	5.63795e-27	FALSE
MT	769	G	A	769.G.A		2555	1046	490	0.49737	8.73424e-159	TRUE
MT	2623	A	G	2623.A.G		1113	707	568	0.0667966	0.0263924	FALSE
MT	3565	A	C	3565.A.C		8005	0	0	0.445002	0	FALSE
MT	3577	A	C	3577.A.C		2492	1	0	0.473537	3.19545e-137	TRUE
MT	3578	T	A	3578.T.A		1645	0	0	0.201555	3.72361e-16	FALSE
MT	3578	T	G	3578.T.G		1380	56	2	0.147571	5.30222e-08	FALSE
MT	3590	T	A	3590.T.A		1775	0	0	-0.0930486	0.000106762	FALSE
MT	3605	T	A	3605.T.A		1783	0	0	-0.0570355	0.0173424	FALSE
MT	4216	T	C	4216.T.C		1677	1353	1215	0.831523	0	TRUE
MT	4560	G	A	4560.G.A		1838	1519	1296	0.892171	0	TRUE
MT	6641	T	C	6641.T.C		1490	533	491	0.692268	4.17038e-208	TRUE
MT	7028	C	T	7028.C.T		1959	1728	1555	0.598582	8.07648e-187	TRUE
MT	7145	C	T	7145.C.T		1915	130	67	0.791724	0	TRUE
MT	7146	A	G	7146.A.G		1317	233	142	0.778154	1.70569e-249	TRUE
MT	7158	A	G	7158.A.G		2124	168	107	0.760963	0	TRUE
MT	7169	T	C	7169.T.C		2115	181	133	0.756348	0	TRUE
MT	7220	T	C	7220.T.C		1198	177	148	0.759472	2.21117e-225	TRUE
MT	7299	A	G	7299.A.G		1823	623	476	0.76033	0	TRUE
MT	7325	A	G	7325.A.G		1055	422	316	0.623122	4.39498e-114	TRUE
MT	7364	A	G	7364.A.G		1731	437	297	0.783792	0	TRUE
MT	7473	A	G	7473.A.G		1045	101	101	0.617758	8.87546e-111	TRUE
MT	8270	CACCCCCTCT	C	8270.CACCCCCTCT.C		1168	304	72	0.519942	2.29507e-80	TRUE
MT	8856	G	A	8856.G.A		1894	60	46	0.736115	5.84450015091444e-319	TRUE
MT	8856	G	T	8856.G.T		2511	10	5	0.700393	0	TRUE
MT	10926	T	G	10926.T.G		1038	0	0	0.158426	4.01715e-07	FALSE
MT	10935	A	C	10935.A.C		1005	0	0	0.721254	3.2176e-160	TRUE
MT	10935	A	G	10935.A.G		3225	2	1	0.00167545	0.924697	FALSE
MT	10946	A	C	10946.A.C		2470	3	2	0.713818	0	TRUE
MT	10953	T	C	10953.T.C		1719	1	1	0.533449	1.08381e-124	TRUE
MT	11031	GA	G	11031.GA.G		1482	456	313	0.159932	6.98592e-10	FALSE
MT	11711	G	A	11711.G.A		1546	175	94	0.300714	2.18116e-33	FALSE
MT	12417	CA	C	12417.CA.C		2189	444	253	0.267484	2.281e-36	FALSE
MT	12684	G	A	12684.G.A	numtA	30984	22461	18194	0.81062	0	TRUE
MT	12693	A	G	12693.A.G		1400	281	82	0.459299	1.3384e-69	TRUE
MT	12705	C	T	12705.C.T	numtA	16792	15301	14322	0.751554	0	TRUE
MT	13062	A	G	13062.A.G	numtA	9955	7040	6827	0.756106	0	TRUE
MT	13095	T	C	13095.T.C	numtA	13699	6506	5982	0.800942	0	TRUE
MT	13105	A	G	13105.A.G	numtA	11149	5381	5107	0.786663	0	TRUE
MT	13227	C	CT	13227.C.CT		1149	73	64	0.806907	7.78399e-264	TRUE
MT	13761	A	C	13761.A.C		2322	0	0	0.540659	1.51812e-174	TRUE
MT	13762	T	G	13762.T.G		5185	1	1	-0.477734	2.81436e-290	FALSE
MT	13769	T	G	13769.T.G		2973	0	0	0.200626	6.50989e-28	FALSE
MT	13780	A	C	13780.A.C		2476	25	12	0.144825	7.64257e-13	FALSE
MT	14769	A	G	14769.A.G		1329	251	93	0.442005	6.53483e-64	FALSE
MT	14783	T	C	14783.T.C		1424	440	157	0.533657	1.32091e-104	TRUE
MT	14798	T	C	14798.T.C		1314	410	183	0.60075	4.6971e-128	TRUE
MT	15301	G	A	15301.G.A		3987	1353	534	0.510534	1.52246e-261	TRUE
MT	16093	T	C	16093.T.C		3452	897	629	0.376309	2.14628e-84	FALSE
MT	16126	T	C	16126.T.C		1323	416	220	0.526848	4.06565e-92	TRUE
MT	16129	G	A	16129.G.A		18223	6494	3456	0.52375	0	TRUE
MT	16131	T	C	16131.T.C		2005	545	258	0.427408	4.6974e-89	FALSE
MT	16172	T	C	16172.T.C		1231	364	280	0.310009	4.19038e-27	FALSE
MT	16179	CA	C	16179.CA.C		6823	6403	6389	0.145046	4.44278e-33	FALSE
MT	16179	CAA	C	16179.CAA.C		5080	2231	2222	0.187912	2.32695e-38	FALSE
MT	16181	A	C	16181.A.C		1183	7	7	0.273041	2.30271e-21	FALSE
MT	16183	A	AC	16183.A.AC		5115	4046	4028	-0.129063	4.71231e-20	FALSE
MT	16183	A	ACC	16183.A.ACC		5379	3528	3483	-0.0381687	0.00593886	FALSE
MT	16183	A	ACCC	16183.A.ACCC		7849	3506	3442	0.144254	3.35798e-37	FALSE
MT	16183	A	ACCCC	16183.A.ACCCC		2511	1440	1438	0.00736117	0.714616	FALSE
MT	16183	A	C	16183.A.C		12042	1167	1152	0.0346942	0.00701452	FALSE
MT	16187	C	T	16187.C.T		1179	354	188	0.597117	3.52004e-111	TRUE
MT	16188	CT	C	16188.CT.C		6219	5132	4975	0.125796	1.12937e-22	FALSE
MT	16189	T	A	16189.T.A	numtB	11245	2577	1581	0.719354	0	TRUE
MT	16189	T	C	16189.T.C		4225	987	663	0.376407	2.48027e-126	FALSE
MT	16192	C	CT	16192.C.CT		1874	1652	1648	0.0664445	0.00653762	FALSE
MT	16192	C	T	16192.C.T		1793	662	581	0.116583	0.00013522	FALSE
MT	16209	T	C	16209.T.C		1186	389	218	0.609282	1.61048e-119	TRUE
MT	16218	C	T	16218.C.T	numtB	23725	7820	3913	0.771402	0	TRUE
MT	16223	C	T	16223.C.T		1496	551	285	0.460337	7.50577e-73	TRUE
MT	16230	A	G	16230.A.G	numtB	26500	9717	4733	0.774065	0	TRUE
MT	16234	C	T	16234.C.T		1479	539	298	0.582441	1.22549e-132	TRUE
MT	16249	T	C	16249.T.C	numtB	26582	11050	5567	0.768122	0	TRUE
MT	16257	C	CA	16257.C.CA		27238	13988	5745	0.773082	0	TRUE
MT	16263	TC	T	16263.TC.T		26021	12982	5778	0.775946	0	TRUE
MT	16270	C	T	16270.C.T		1032	361	176	0.448978	4.7877e-49	FALSE
MT	16274	G	A	16274.G.A	numtB	27687	12823	6117	0.758028	0	TRUE
MT	16278	C	T	16278.C.T	numtB	24327	12079	5774	0.746203	0	TRUE
MT	16284	A	G	16284.A.G	numtB	27877	13302	6227	0.756164	0	TRUE
MT	16288	T	C	16288.T.C	numtB	27566	13471	6375	0.755369	0	TRUE
MT	16290	C	T	16290.C.T	numtB	25947	12631	6051	0.760553	0	TRUE
MT	16293	A	C	16293.A.C	numtB	27812	12670	6945	0.737022	0	TRUE
MT	16293	A	G	16293.A.G		1329	356	189	0.25234	5.32812e-20	FALSE
MT	16294	C	T	16294.C.T		2097	580	172	0.465169	8.80009e-109	TRUE
MT	16301	C	T	16301.C.T	numtB	25922	13325	6363	0.752466	0	TRUE
MT	16309	A	G	16309.A.G		1045	242	72	0.437283	6.38854e-46	FALSE
MT	16311	T	C	16311.T.C	numtB	19827	11354	6314	0.703824	0	TRUE
MT	16355	C	T	16355.C.T	numtB	17456	9618	5098	0.791738	0	TRUE
MT	16356	T	C	16356.T.C	numtB	16593	9245	4942	0.798473	0	TRUE
MT	16362	T	C	16362.T.C		1647	669	431	0.462964	3.20281e-85	TRUE
MT	16368	T	C	16368.T.C	numtB	17718	9481	5105	0.802576	0	TRUE
MT	16390	G	A	16390.G.A	numtB	16890	8931	5157	0.74842	0	TRUE
MT	16399	A	G	16399.A.G	numtB	12534	6649	4158	0.786798	0	TRUE
MT	16444	C	T	16444.C.T		3911	1875	1675	0.670395	0	TRUE
MT	16496	G	A	16496.G.A	numtB	13558	1436	984	0.833583	0	TRUE
MT	16519	T	C	16519.T.C	numtB	5532	2908	2548	0.485053	4.24308151696343e-316	TRUE
MT	16527	C	T	16527.C.T	numtB	12430	1297	918	0.819164	0	TRUE

## Sheet: Co-occuringHeteroplasmies
	318.T.C	464.A.C	493.A.C	545.G.C	769.G.A	3577.A.C	4216.T.C	4560.G.A	6641.T.C	7028.C.T	7145.C.T	7146.A.G	7158.A.G	7169.T.C	7220.T.C	7299.A.G	7325.A.G	7364.A.G	7473.A.G	8270.CACCCCCTCT.C	8856.G.A	8856.G.T	10935.A.C	10946.A.C	10953.T.C	12684.G.A	12693.A.G	12705.C.T	13062.A.G	13095.T.C	13105.A.G	13227.C.CT	13761.A.C	14783.T.C	14798.T.C	15301.G.A	16126.T.C	16129.G.A	16187.C.T	16189.T.A	16209.T.C	16218.C.T	16223.C.T	16230.A.G	16234.C.T	16249.T.C	16257.C.CA	16263.TC.T	16274.G.A
318.T.C	0	0.003	-0.001	0.019	0.009	-0.013	0.008	0.013	0.009	0.034	0.021	0.013	0.028	0.026	0.012	0.003	0.008	0.015	0.018	0	-0.007	-0.005	0.011	0.001	0.029	0.028	0.01	0.025	0.029	0.029	0.03	0.006	-0.018	-0.001	-0.005	0.007	0.003	0.012	0.002	0.014	0.002	0.021	0.002	0.024	-0.002	0.023	0.022	0.022	0.019
464.A.C	0.003	0	0.073	0.02	0.006	0.069	0.02	0.025	0.051	0.013	0.024	0.033	0.027	0.029	0.025	0.035	0.026	0.014	0.031	-0.002	0.007	0.031	0.071	0.064	0.078	0.073	0.005	0.092	0.072	0.073	0.076	0.013	0.045	0.007	0.002	0.011	-0.001	0.015	0.015	0.056	0.004	0.06	0.016	0.068	0.004	0.067	0.068	0.066	0.062
493.A.C	-0.001	0.073	0	0.009	0.014	0.002	0.027	0.046	0.046	0.065	0.033	0.047	0.037	0.042	0.024	0.032	0.037	0.03	0.047	0.001	0.015	0.023	0.016	0.06	0.015	0.079	0	0.088	0.079	0.078	0.074	0.03	-0.013	-0.006	-0.001	0.003	-0.002	0.013	0.005	0.047	0.006	0.059	0.004	0.068	0.004	0.068	0.074	0.073	0.065
545.G.C	0.019	0.02	0.009	0	-0.001	0.027	0.009	0.01	0.012	-0.002	0.002	0.011	0.003	0.002	0.002	0.027	0.002	0.003	-0.002	0	-0.003	-0.001	0.016	0.001	0.037	0.027	0.003	0.024	0.02	0.024	0.027	0.004	0.047	-0.004	-0.004	0.007	-0.002	0	0.003	0.011	0	0.009	-0.001	0.009	-0.002	0.01	0.01	0.011	0.009
769.G.A	0.009	0.006	0.014	-0.001	0	0.018	0.01	0.01	0.083	0.205	0.015	0.118	0.009	0.017	0.01	0.008	0.01	0.013	0.023	0.006	0.001	0.008	0.019	-0.008	0.012	0.001	0.22	0.069	0.001	0.004	0.05	-0.007	-0.011	0.003	0.012	0.25	0.01	0.038	0.243	-0.006	0.01	0	0.123	0.015	0.007	-0.004	-0.006	-0.008	-0.006
3577.A.C	-0.013	0.069	0.002	0.027	0.018	0	-0.007	-0.005	-0.003	0.006	0.005	0.007	0.007	0.007	-0.002	0.003	0.006	0.012	0.013	0.002	0	0.013	0.086	0.008	0.074	-0.021	0.027	-0.011	-0.012	-0.012	-0.009	-0.005	0.204	0.002	-0.001	0.026	-0.004	-0.011	0.008	-0.002	0.003	-0.012	0.01	-0.013	0.004	-0.017	-0.023	-0.021	-0.021
4216.T.C	0.008	0.02	0.027	0.009	0.01	-0.007	0	0.649	0.085	0.606	0.017	0.047	0.022	0.025	0.031	0.026	0.03	0.005	0.026	0.004	0.011	0.001	0.009	0.017	0.003	0.204	-0.002	0.216	0.201	0.198	0.187	0.07	-0.004	0.003	0.045	-0.006	0.06	0.034	-0.002	0.121	0	0.147	0	0.156	0.001	0.159	0.177	0.179	0.149
4560.G.A	0.013	0.025	0.046	0.01	0.01	-0.005	0.649	0	0.091	0.512	0.018	0.043	0.026	0.027	0.027	0.018	0.026	0.003	0.037	-0.003	0.014	0.006	0.01	0.02	0.005	0.24	0.002	0.253	0.241	0.238	0.226	0.077	-0.003	0.003	0.002	-0.007	0.002	0.039	-0.004	0.142	0.01	0.166	0	0.176	-0.003	0.183	0.201	0.203	0.173
6641.T.C	0.009	0.051	0.046	0.012	0.083	-0.003	0.085	0.091	0	0.138	0.088	0.282	0.099	0.109	0.056	0.064	0.093	0.069	0.141	-0.001	0.021	0.011	0.022	0.041	0.019	0.253	0.006	0.312	0.271	0.269	0.314	0.096	-0.004	-0.005	0.001	-0.001	0.002	0.092	0.216	0.189	0.02	0.21	0.019	0.273	0.046	0.241	0.243	0.246	0.209
7028.C.T	0.034	0.013	0.065	-0.002	0.205	0.006	0.606	0.512	0.138	0	0.047	0.093	0.023	0.034	0.022	0.019	0.038	0.037	0.105	0.014	0.01	0.011	0.03	0.018	0.009	0.202	0.175	0.253	0.194	0.195	0.196	0.068	-0.013	0.053	0.121	0.127	0.11	0.044	0.028	0.131	0.048	0.159	0.118	0.161	0.006	0.18	0.183	0.181	0.163
7145.C.T	0.021	0.024	0.033	0.002	0.015	0.005	0.017	0.018	0.088	0.047	0	0.441	0.569	0.626	0.234	0.137	0.183	0.266	0.403	0	0.003	0.004	0.012	0.022	0.021	0.084	0.026	0.153	0.086	0.089	0.075	0.021	0.003	-0.004	-0.002	0.05	-0.002	0.023	0.032	0.068	0.017	0.071	0.013	0.093	0.014	0.082	0.087	0.088	0.073
7146.A.G	0.013	0.033	0.047	0.011	0.118	0.007	0.047	0.043	0.282	0.093	0.441	0	0.527	0.62	0.251	0.219	0.247	0.198	0.407	0.003	0.012	0.009	0.016	0.03	0.023	0.122	0.033	0.161	0.134	0.135	0.187	0.039	-0.008	-0.006	-0.003	0.03	0.005	0.065	0.281	0.102	0.019	0.115	0.054	0.17	0.039	0.14	0.137	0.136	0.117
7158.A.G	0.028	0.027	0.037	0.003	0.009	0.007	0.022	0.026	0.099	0.023	0.569	0.527	0	0.728	0.264	0.167	0.207	0.309	0.478	0	0.002	0.002	0.012	0.027	0.024	0.094	0.025	0.078	0.098	0.102	0.096	0.025	0.007	-0.004	-0.001	0.043	-0.001	0.028	0.038	0.075	0.019	0.08	0.007	0.106	0.015	0.093	0.098	0.099	0.082
7169.T.C	0.026	0.029	0.042	0.002	0.017	0.007	0.025	0.027	0.109	0.034	0.626	0.62	0.728	0	0.311	0.201	0.24	0.35	0.539	0	0.003	0.012	0.013	0.029	0.03	0.1	0.025	0.098	0.104	0.108	0.113	0.027	0.003	-0.005	-0.002	0.042	-0.002	0.03	0.041	0.085	0.022	0.091	0.011	0.121	0.017	0.105	0.112	0.113	0.095
7220.T.C	0.012	0.025	0.024	0.002	0.01	-0.002	0.031	0.027	0.056	0.022	0.234	0.251	0.264	0.311	0	0.143	0.201	0.156	0.219	0.001	0.003	0.011	0.015	0.018	0.023	0.088	0.013	0.076	0.091	0.093	0.081	0.024	-0.006	-0.004	0	0.006	0	0.018	0.011	0.063	0.01	0.071	0.004	0.081	0.004	0.077	0.086	0.087	0.074
7299.A.G	0.003	0.035	0.032	0.027	0.008	0.003	0.026	0.018	0.064	0.019	0.137	0.219	0.167	0.201	0.143	0	0.348	0.165	0.29	0	0.014	0.016	0.008	0.016	0.013	0.08	0.01	0.061	0.084	0.085	0.083	0.016	-0.007	-0.001	-0.002	0.002	-0.001	0.016	0.018	0.054	0.01	0.064	0	0.076	0.01	0.072	0.075	0.075	0.065
7325.A.G	0.008	0.026	0.037	0.002	0.01	0.006	0.03	0.026	0.093	0.038	0.183	0.247	0.207	0.24	0.201	0.348	0	0.276	0.275	-0.002	0.023	0.001	0.018	0.014	0.017	0.116	0.011	0.135	0.122	0.125	0.114	0.026	0.004	-0.005	0	-0.003	0.001	0.024	0.02	0.077	0.01	0.09	-0.001	0.108	0.012	0.102	0.111	0.111	0.096
7364.A.G	0.015	0.014	0.03	0.003	0.013	0.012	0.005	0.003	0.069	0.037	0.266	0.198	0.309	0.35	0.156	0.165	0.276	0	0.36	-0.001	0.001	0	0.015	0.011	0.014	0.061	0.019	0.09	0.062	0.069	0.057	0.013	-0.007	0	-0.003	0.066	0	0.012	0.025	0.04	0.02	0.047	0.009	0.065	0.016	0.057	0.059	0.06	0.049
7473.A.G	0.018	0.031	0.047	-0.002	0.023	0.013	0.026	0.037	0.141	0.105	0.403	0.407	0.478	0.539	0.219	0.29	0.275	0.36	0	-0.002	0.008	0.012	0.013	0.034	0.025	0.135	0.015	0.173	0.143	0.147	0.152	0.04	0.001	-0.007	0.002	0.019	-0.003	0.037	0.05	0.111	0.025	0.122	0.017	0.161	0.028	0.137	0.144	0.144	0.119
8270.CACCCCCTCT.C	0	-0.002	0.001	0	0.006	0.002	0.004	-0.003	-0.001	0.014	0	0.003	0	0	0.001	0	-0.002	-0.001	-0.002	0	-0.001	-0.002	-0.002	-0.003	0.005	0.001	0.007	0.003	0.001	-0.001	-0.001	-0.002	-0.004	0.011	0	0.007	0.001	0.002	0.001	-0.003	0	-0.002	0.004	-0.002	0	-0.001	-0.002	-0.003	-0.001
8856.G.A	-0.007	0.007	0.015	-0.003	0.001	0	0.011	0.014	0.021	0.01	0.003	0.012	0.002	0.003	0.003	0.014	0.023	0.001	0.008	-0.001	0	0.019	0.028	0.035	0.025	0.037	0	0.034	0.037	0.038	0.035	0.007	-0.005	0.002	-0.002	-0.001	0	0.008	0.002	0.016	0.001	0.022	-0.002	0.027	0.001	0.027	0.03	0.031	0.026
8856.G.T	-0.005	0.031	0.023	-0.001	0.008	0.013	0.001	0.006	0.011	0.011	0.004	0.009	0.002	0.012	0.011	0.016	0.001	0	0.012	-0.002	0.019	0	0.007	0.01	-0.003	0.015	0.002	0.015	0.013	0.014	0.015	0.003	-0.016	-0.009	0.001	0	-0.003	0.005	0.001	0.019	-0.001	0.016	-0.001	0.014	0.003	0.015	0.016	0.016	0.014
10935.A.C	0.011	0.071	0.016	0.016	0.019	0.086	0.009	0.01	0.022	0.03	0.012	0.016	0.012	0.013	0.015	0.008	0.018	0.015	0.013	-0.002	0.028	0.007	0	0.069	0.202	0.028	-0.001	0.034	0.029	0.029	0.029	0.005	0.075	-0.003	0.005	0.01	-0.002	0.001	0.013	0.034	0.003	0.024	0.002	0.028	0.001	0.024	0.022	0.021	0.015
10946.A.C	0.001	0.064	0.06	0.001	-0.008	0.008	0.017	0.02	0.041	0.018	0.022	0.03	0.027	0.029	0.018	0.016	0.014	0.011	0.034	-0.003	0.035	0.01	0.069	0	0.049	0.063	-0.01	0.071	0.065	0.066	0.062	0.02	-0.001	-0.009	0	-0.016	-0.003	0.005	0.008	0.04	0.006	0.042	0.009	0.052	0.002	0.052	0.054	0.054	0.045
10953.T.C	0.029	0.078	0.015	0.037	0.012	0.074	0.003	0.005	0.019	0.009	0.021	0.023	0.024	0.03	0.023	0.013	0.017	0.014	0.025	0.005	0.025	-0.003	0.202	0.049	0	0.038	-0.003	0.053	0.04	0.042	0.043	0.004	0.092	0.004	0.002	0.001	0.001	0.013	0.005	0.038	0.005	0.034	0.008	0.038	0	0.033	0.033	0.033	0.024
12684.G.A	0.028	0.073	0.079	0.027	0.001	-0.021	0.204	0.24	0.253	0.202	0.084	0.122	0.094	0.1	0.088	0.08	0.116	0.061	0.135	0.001	0.037	0.015	0.028	0.063	0.038	0	-0.005	0.975	0.878	0.893	0.844	0.347	-0.017	-0.01	0.011	-0.017	0.004	0.103	0.013	0.37	0.011	0.42	0.008	0.457	0.004	0.454	0.498	0.504	0.435
12693.A.G	0.01	0.005	0	0.003	0.22	0.027	-0.002	0.002	0.006	0.175	0.026	0.033	0.025	0.025	0.013	0.01	0.011	0.019	0.015	0.007	0	0.002	-0.001	-0.01	-0.003	-0.005	0	0.035	-0.005	-0.003	0.01	-0.007	-0.002	0.001	0.001	0.218	0.004	0.017	0.025	0.006	0.005	0.004	0.048	0.006	0	0.002	0	-0.001	0.003
12705.C.T	0.025	0.092	0.088	0.024	0.069	-0.011	0.216	0.253	0.312	0.253	0.153	0.161	0.078	0.098	0.076	0.061	0.135	0.09	0.173	0.003	0.034	0.015	0.034	0.071	0.053	0.975	0.035	0	0.879	0.892	0.881	0.358	-0.029	0.023	0.014	0.063	0.009	0.124	0.049	0.391	0.016	0.444	0.079	0.479	-0.003	0.491	0.523	0.526	0.495
13062.A.G	0.029	0.072	0.079	0.02	0.001	-0.012	0.201	0.241	0.271	0.194	0.086	0.134	0.098	0.104	0.091	0.084	0.122	0.062	0.143	0.001	0.037	0.013	0.029	0.065	0.04	0.878	-0.005	0.879	0	0.966	0.903	0.373	-0.008	-0.007	0.01	-0.022	0.006	0.103	0.017	0.37	0.007	0.418	0.007	0.454	0.003	0.452	0.496	0.503	0.433
13095.T.C	0.029	0.073	0.078	0.024	0.004	-0.012	0.198	0.238	0.269	0.195	0.089	0.135	0.102	0.108	0.093	0.085	0.125	0.069	0.147	-0.001	0.038	0.014	0.029	0.066	0.042	0.893	-0.003	0.892	0.966	0	0.936	0.377	-0.01	-0.008	0.009	-0.018	0.006	0.106	0.02	0.376	0.007	0.422	0.008	0.458	0.004	0.455	0.499	0.506	0.436
13105.A.G	0.03	0.076	0.074	0.027	0.05	-0.009	0.187	0.226	0.314	0.196	0.075	0.187	0.096	0.113	0.081	0.083	0.114	0.057	0.152	-0.001	0.035	0.015	0.029	0.062	0.043	0.844	0.01	0.881	0.903	0.936	0	0.368	-0.011	-0.007	0.009	-0.002	0.009	0.111	0.098	0.359	0.008	0.403	0.023	0.45	0.01	0.436	0.476	0.482	0.429
13227.C.CT	0.006	0.013	0.03	0.004	-0.007	-0.005	0.07	0.077	0.096	0.068	0.021	0.039	0.025	0.027	0.024	0.016	0.026	0.013	0.04	-0.002	0.007	0.003	0.005	0.02	0.004	0.347	-0.007	0.358	0.373	0.377	0.368	0	-0.004	-0.001	0.002	-0.01	0.001	0.036	0.002	0.124	0	0.144	-0.003	0.153	-0.002	0.158	0.175	0.179	0.152
13761.A.C	-0.018	0.045	-0.013	0.047	-0.011	0.204	-0.004	-0.003	-0.004	-0.013	0.003	-0.008	0.007	0.003	-0.006	-0.007	0.004	-0.007	0.001	-0.004	-0.005	-0.016	0.075	-0.001	0.092	-0.017	-0.002	-0.029	-0.008	-0.01	-0.011	-0.004	0	-0.003	-0.002	-0.011	-0.004	-0.01	-0.001	-0.005	-0.003	-0.012	-0.008	-0.015	-0.005	-0.013	-0.016	-0.014	-0.015
14783.T.C	-0.001	0.007	-0.006	-0.004	0.003	0.002	0.003	0.003	-0.005	0.053	-0.004	-0.006	-0.004	-0.005	-0.004	-0.001	-0.005	0	-0.007	0.011	0.002	-0.009	-0.003	-0.009	0.004	-0.01	0.001	0.023	-0.007	-0.008	-0.007	-0.001	-0.003	0	0	0.185	0.001	0.01	0	0.004	0.004	0.006	0.089	0.005	0	0.007	0.004	0.002	-0.001
14798.T.C	-0.005	0.002	-0.001	-0.004	0.012	-0.001	0.045	0.002	0.001	0.121	-0.002	-0.003	-0.001	-0.002	0	-0.002	0	-0.003	0.002	0	-0.002	0.001	0.005	0	0.002	0.011	0.001	0.014	0.01	0.009	0.009	0.002	-0.002	0	0	-0.001	0.041	0.006	0.002	0.005	0.004	0.007	0	0.006	0.003	0.008	0.009	0.009	0.007
15301.G.A	0.007	0.011	0.003	0.007	0.25	0.026	-0.006	-0.007	-0.001	0.127	0.05	0.03	0.043	0.042	0.006	0.002	-0.003	0.066	0.019	0.007	-0.001	0	0.01	-0.016	0.001	-0.017	0.218	0.063	-0.022	-0.018	-0.002	-0.01	-0.011	0.185	-0.001	0	0.006	0.022	0.039	-0.007	0.023	-0.008	0.154	-0.006	0.001	-0.007	-0.014	-0.015	-0.014
16126.T.C	0.003	-0.001	-0.002	-0.002	0.01	-0.004	0.06	0.002	0.002	0.11	-0.002	0.005	-0.001	-0.002	0	-0.001	0.001	0	-0.003	0.001	0	-0.003	-0.002	-0.003	0.001	0.004	0.004	0.009	0.006	0.006	0.009	0.001	-0.004	0.001	0.041	0.006	0	0.008	0.01	-0.002	0.001	0.004	0.006	0.004	0.001	0.004	0.004	0.004	0.005
16129.G.A	0.012	0.015	0.013	0	0.038	-0.011	0.034	0.039	0.092	0.044	0.023	0.065	0.028	0.03	0.018	0.016	0.024	0.012	0.037	0.002	0.008	0.005	0.001	0.005	0.013	0.103	0.017	0.124	0.103	0.106	0.111	0.036	-0.01	0.01	0.006	0.022	0.008	0	0.066	0.138	0.008	0.145	0.02	0.171	0.01	0.156	0.168	0.167	0.143
16187.C.T	0.002	0.015	0.005	0.003	0.243	0.008	-0.002	-0.004	0.216	0.028	0.032	0.281	0.038	0.041	0.011	0.018	0.02	0.025	0.05	0.001	0.002	0.001	0.013	0.008	0.005	0.013	0.025	0.049	0.017	0.02	0.098	0.002	-0.001	0	0.002	0.039	0.01	0.066	0	0.006	0.016	0.007	0.152	0.048	0.04	0.018	0.002	0.001	0
16189.T.A	0.014	0.056	0.047	0.011	-0.006	-0.002	0.121	0.142	0.189	0.131	0.068	0.102	0.075	0.085	0.063	0.054	0.077	0.04	0.111	-0.003	0.016	0.019	0.034	0.04	0.038	0.37	0.006	0.391	0.37	0.376	0.359	0.124	-0.005	0.004	0.005	-0.007	-0.002	0.138	0.006	0	0.009	0.747	0.009	0.766	0.002	0.715	0.769	0.75	0.621
16209.T.C	0.002	0.004	0.006	0	0.01	0.003	0	0.01	0.02	0.048	0.017	0.019	0.019	0.022	0.01	0.01	0.01	0.02	0.025	0	0.001	-0.001	0.003	0.006	0.005	0.011	0.005	0.016	0.007	0.007	0.008	0	-0.003	0.004	0.004	0.023	0.001	0.008	0.016	0.009	0	0.011	0.068	0.056	0.062	0.013	0.012	0.013	0.012
16218.C.T	0.021	0.06	0.059	0.009	0	-0.012	0.147	0.166	0.21	0.159	0.071	0.115	0.08	0.091	0.071	0.064	0.09	0.047	0.122	-0.002	0.022	0.016	0.024	0.042	0.034	0.42	0.004	0.444	0.418	0.422	0.403	0.144	-0.012	0.006	0.007	-0.008	0.004	0.145	0.007	0.747	0.011	0	0.011	0.792	0.006	0.756	0.816	0.8	0.67
16223.C.T	0.002	0.016	0.004	-0.001	0.123	0.01	0	0	0.019	0.118	0.013	0.054	0.007	0.011	0.004	0	-0.001	0.009	0.017	0.004	-0.002	-0.001	0.002	0.009	0.008	0.008	0.048	0.079	0.007	0.008	0.023	-0.003	-0.008	0.089	0	0.154	0.006	0.02	0.152	0.009	0.068	0.011	0	0.023	0.015	0.011	0.009	0.006	0.005
16230.A.G	0.024	0.068	0.068	0.009	0.015	-0.013	0.156	0.176	0.273	0.161	0.093	0.17	0.106	0.121	0.081	0.076	0.108	0.065	0.161	-0.002	0.027	0.014	0.028	0.052	0.038	0.457	0.006	0.479	0.454	0.458	0.45	0.153	-0.015	0.005	0.006	-0.006	0.004	0.171	0.048	0.766	0.056	0.792	0.023	0	0.047	0.823	0.884	0.867	0.73
16234.C.T	-0.002	0.004	0.004	-0.002	0.007	0.004	0.001	-0.003	0.046	0.006	0.014	0.039	0.015	0.017	0.004	0.01	0.012	0.016	0.028	0	0.001	0.003	0.001	0.002	0	0.004	0	-0.003	0.003	0.004	0.01	-0.002	-0.005	0	0.003	0.001	0.001	0.01	0.04	0.002	0.062	0.006	0.015	0.047	0	0.015	0.007	0.007	0.005
16249.T.C	0.023	0.067	0.068	0.01	-0.004	-0.017	0.159	0.183	0.241	0.18	0.082	0.14	0.093	0.105	0.077	0.072	0.102	0.057	0.137	-0.001	0.027	0.015	0.024	0.052	0.033	0.454	0.002	0.491	0.452	0.455	0.436	0.158	-0.013	0.007	0.008	-0.007	0.004	0.156	0.018	0.715	0.013	0.756	0.011	0.823	0.015	0	0.895	0.878	0.737
16257.C.CA	0.022	0.068	0.074	0.01	-0.006	-0.023	0.177	0.201	0.243	0.183	0.087	0.137	0.098	0.112	0.086	0.075	0.111	0.059	0.144	-0.002	0.03	0.016	0.022	0.054	0.033	0.498	0	0.523	0.496	0.499	0.476	0.175	-0.016	0.004	0.009	-0.014	0.004	0.168	0.002	0.769	0.012	0.816	0.009	0.884	0.007	0.895	0	0.981	0.826
16263.TC.T	0.022	0.066	0.073	0.011	-0.008	-0.021	0.179	0.203	0.246	0.181	0.088	0.136	0.099	0.113	0.087	0.075	0.111	0.06	0.144	-0.003	0.031	0.016	0.021	0.054	0.033	0.504	-0.001	0.526	0.503	0.506	0.482	0.179	-0.014	0.002	0.009	-0.015	0.004	0.167	0.001	0.75	0.013	0.8	0.006	0.867	0.007	0.878	0.981	0	0.84
16274.G.A	0.019	0.062	0.065	0.009	-0.006	-0.021	0.149	0.173	0.209	0.163	0.073	0.117	0.082	0.095	0.074	0.065	0.096	0.049	0.119	-0.001	0.026	0.014	0.015	0.045	0.024	0.435	0.003	0.495	0.433	0.436	0.429	0.152	-0.015	-0.001	0.007	-0.014	0.005	0.143	0	0.621	0.012	0.67	0.005	0.73	0.005	0.737	0.826	0.84	0
16278.C.T	0.022	0.058	0.063	0.01	0.125	-0.016	0.151	0.169	0.246	0.185	0.127	0.154	0.08	0.102	0.066	0.052	0.096	0.038	0.136	-0.001	0.027	0.014	0.02	0.039	0.027	0.418	0.039	0.45	0.416	0.42	0.42	0.147	-0.021	-0.001	0.012	0.02	0.012	0.145	0.033	0.568	0.015	0.61	0.02	0.686	0.007	0.739	0.761	0.775	0.728
16284.A.G	0.033	0.056	0.064	0.009	-0.01	-0.014	0.152	0.176	0.221	0.167	0.076	0.118	0.086	0.097	0.076	0.065	0.099	0.052	0.123	-0.002	0.028	0.015	0.015	0.046	0.027	0.442	-0.001	0.48	0.44	0.443	0.432	0.154	-0.012	0.001	0.007	-0.016	0.004	0.151	0	0.621	0.008	0.677	0.002	0.735	0.003	0.756	0.837	0.851	0.75
16288.T.C	0.023	0.062	0.072	0.01	-0.012	-0.023	0.167	0.191	0.234	0.165	0.083	0.127	0.094	0.106	0.082	0.071	0.108	0.056	0.134	-0.003	0.03	0.014	0.016	0.049	0.028	0.482	-0.002	0.497	0.478	0.481	0.454	0.156	-0.015	-0.001	0.008	-0.017	0.005	0.162	-0.001	0.666	0.01	0.731	0.001	0.797	0.004	0.806	0.903	0.917	0.802
16290.C.T	0.02	0.057	0.066	0.006	-0.012	-0.018	0.157	0.177	0.222	0.17	0.075	0.114	0.085	0.096	0.074	0.063	0.099	0.051	0.123	-0.002	0.028	0.013	0.015	0.046	0.028	0.441	-0.001	0.457	0.439	0.441	0.428	0.143	-0.013	0.001	0.007	-0.012	0.007	0.149	0.002	0.609	0.012	0.665	0.029	0.723	0.003	0.744	0.825	0.838	0.732
16293.A.C	0.022	0.066	0.076	0.009	-0.014	-0.026	0.174	0.199	0.244	0.176	0.084	0.129	0.095	0.107	0.085	0.072	0.109	0.055	0.137	-0.003	0.031	0.016	0.015	0.055	0.03	0.498	-0.002	0.519	0.495	0.498	0.472	0.163	-0.016	-0.001	0.008	-0.02	0.005	0.16	-0.002	0.68	0.011	0.752	0.001	0.817	0.003	0.833	0.933	0.949	0.832
16294.C.T	0.001	-0.002	0.005	-0.002	0.056	0.008	0.012	-0.002	0.005	0.042	0.006	0.025	0.004	0.006	0.003	0.004	0.002	0.003	0.004	0.003	-0.002	-0.005	0	-0.003	0.006	0.001	0.075	0.008	-0.001	0	0.006	0.004	-0.002	0	0.004	0.042	0.016	0.005	0.026	-0.002	0.001	-0.003	0.014	-0.003	0	-0.004	-0.002	-0.002	0
16301.C.T	0.022	0.063	0.07	0.01	-0.01	-0.022	0.162	0.186	0.233	0.161	0.084	0.127	0.096	0.108	0.082	0.07	0.106	0.057	0.134	-0.004	0.03	0.014	0.013	0.049	0.03	0.47	-0.001	0.486	0.468	0.471	0.449	0.155	-0.012	-0.002	0.009	-0.018	0.005	0.152	0	0.634	0.01	0.704	0	0.762	0.004	0.776	0.87	0.884	0.774
16311.T.C	0.012	0.036	0.057	0.016	0.028	-0.009	0.095	0.108	0.172	0.152	0.044	0.113	0.086	0.071	0.043	0.042	0.07	0.03	0.083	0.002	0.015	0.007	0.01	0.023	0.019	0.286	0.022	0.33	0.282	0.286	0.284	0.087	-0.015	0.002	0.026	0.007	0.007	0.099	0.061	0.344	0.021	0.381	0.024	0.434	0.014	0.44	0.488	0.499	0.447
16355.C.T	0.022	0.055	0.069	0.014	-0.003	-0.012	0.155	0.167	0.211	0.16	0.075	0.107	0.086	0.099	0.074	0.059	0.093	0.05	0.114	-0.001	0.029	0.009	0.019	0.042	0.026	0.427	0.006	0.463	0.427	0.43	0.414	0.153	-0.013	-0.002	0.006	-0.007	0.006	0.138	-0.001	0.526	0.008	0.58	0.005	0.643	0	0.632	0.703	0.705	0.609
16356.T.C	0.024	0.061	0.08	0.012	-0.003	-0.016	0.179	0.191	0.236	0.175	0.085	0.121	0.098	0.113	0.079	0.068	0.107	0.058	0.128	-0.001	0.034	0.013	0.02	0.045	0.03	0.481	0.004	0.511	0.483	0.486	0.468	0.174	-0.016	-0.001	0.01	-0.006	0.007	0.152	0.001	0.597	0.01	0.669	0.006	0.742	0.001	0.72	0.798	0.801	0.691
16362.T.C	0.01	0	0.003	-0.001	0.004	0.003	-0.001	-0.002	0.005	0.026	0.007	0.006	0.007	0.009	0.008	0.002	0.001	0.006	0.008	0	0	-0.002	0.002	-0.002	0	0.007	0.002	0.017	0.008	0.008	0.009	-0.002	0	0.008	-0.001	0.01	0	0	0.008	0.007	0.025	0.006	0.038	0.014	0.014	0.004	0.003	0.003	0.005
16368.T.C	0.021	0.061	0.081	0.016	0.001	-0.008	0.171	0.193	0.247	0.172	0.12	0.122	0.098	0.113	0.081	0.068	0.109	0.059	0.128	-0.001	0.035	0.011	0.021	0.053	0.029	0.488	0.005	0.516	0.489	0.492	0.469	0.171	-0.012	-0.001	0.008	-0.009	0.008	0.16	0.003	0.595	0.009	0.657	0.003	0.714	0.001	0.721	0.796	0.8	0.693
16390.G.A	0.019	0.041	0.055	0.011	0.127	-0.006	0.112	0.131	0.179	0.141	0.085	0.097	0.068	0.078	0.054	0.043	0.079	0.042	0.096	0	0.02	0.005	0.021	0.031	0.021	0.332	0.043	0.381	0.333	0.336	0.335	0.116	-0.009	0.003	0.009	0.056	0.006	0.111	0.006	0.404	0.006	0.439	0.012	0.479	-0.001	0.478	0.53	0.53	0.478
16399.A.G	0.016	0.05	0.061	0.011	-0.002	-0.012	0.135	0.159	0.207	0.154	0.071	0.096	0.08	0.093	0.069	0.047	0.09	0.045	0.09	-0.001	0.027	0.021	0.012	0.037	0.021	0.406	0.004	0.438	0.408	0.411	0.386	0.147	-0.01	0	0.009	-0.006	0.008	0.133	0.003	0.49	0.007	0.537	0.003	0.583	0	0.583	0.646	0.649	0.555
16444.C.T	0.023	0.052	0.071	0.012	-0.002	-0.005	0.165	0.185	0.236	0.142	0.077	0.114	0.087	0.1	0.078	0.061	0.096	0.049	0.131	-0.004	0.032	0.015	0.014	0.051	0.031	0.443	0.006	0.473	0.452	0.452	0.435	0.149	0	-0.004	0.012	-0.011	0.004	0.161	0.002	0.552	0.011	0.609	0.003	0.65	0.002	0.65	0.717	0.722	0.617
16496.G.A	0.021	0.05	0.069	0.018	-0.004	-0.017	0.149	0.163	0.204	0.136	0.048	0.087	0.058	0.067	0.058	0.05	0.075	0.028	0.086	-0.001	0.022	0.013	0.013	0.044	0.024	0.415	0.001	0.432	0.411	0.415	0.394	0.142	-0.016	0.002	0.007	-0.017	0.006	0.13	0.003	0.416	0.003	0.491	0.003	0.524	0.001	0.533	0.588	0.592	0.512
16519.T.C	0.032	0.03	0.036	-0.001	0.083	-0.004	0.097	0.089	0.162	0.127	0.061	0.099	0.077	0.059	0.024	0.039	0.056	0.042	0.091	0.022	0.008	-0.002	0.007	0.017	0.015	0.216	0.1	0.261	0.214	0.219	0.221	0.075	-0.023	0.018	0.037	0.099	0.024	0.082	0.088	0.265	0.019	0.314	0.05	0.336	0.016	0.296	0.331	0.332	0.289
16527.C.T	0.021	0.033	0.044	0.01	0.056	-0.008	0.093	0.1	0.223	0.092	0.061	0.129	0.072	0.084	0.049	0.05	0.06	0.046	0.114	0	0.017	0.007	0.019	0.03	0.025	0.28	0.019	0.313	0.277	0.282	0.278	0.097	-0.008	0	0.007	0.012	0.007	0.101	0.112	0.302	0.024	0.345	0.018	0.39	0.024	0.368	0.408	0.408	0.353
[truncated: 19 more columns]
